# Supplementary material for: Synthesis of a diruthenium μ-η4-α-diimine complex via dehydrogenative coupling of cyclic amines and its role in dehydrogenative oxidation of pyrrolidine
Source: Royal Society of Chemistry journal article supplement (doi:10.1039/d3dt03187j), 2023-01-01
Supplement: d3dt03187j4.pdf [file d3dt03187j4.pdf]

Supporting Information for the article

## **Synthesis of Diruthenium $\mu\text{-}\eta^4\text{-}\alpha$ -Diimine Complex via Dehydrogenative Coupling of Cyclic Amines and Its Role in Dehydrogenative Oxidation of Pyrrolidine**

Toshiro Takao,\* Ryuichi Shimogawa, Ryosuke Fujita, and Shu Egawa,

Department of Chemical Science and Engineering, School of Materials and Chemical Technology, Tokyo Institute of Technology, 2-12-1 O-okayama, Meguro-ku, Tokyo 152-8552, Japan

### Contents

|    |                                         |      |
|----|-----------------------------------------|------|
| 1. | NMR and IR Spectra of Compounds         | S-2  |
| 2. | Crystal Data and Results of XRD Studies | S-16 |
| 3. | Results of DFT Calculations s           | S-26 |

# 1. NMR Spectra of Compounds

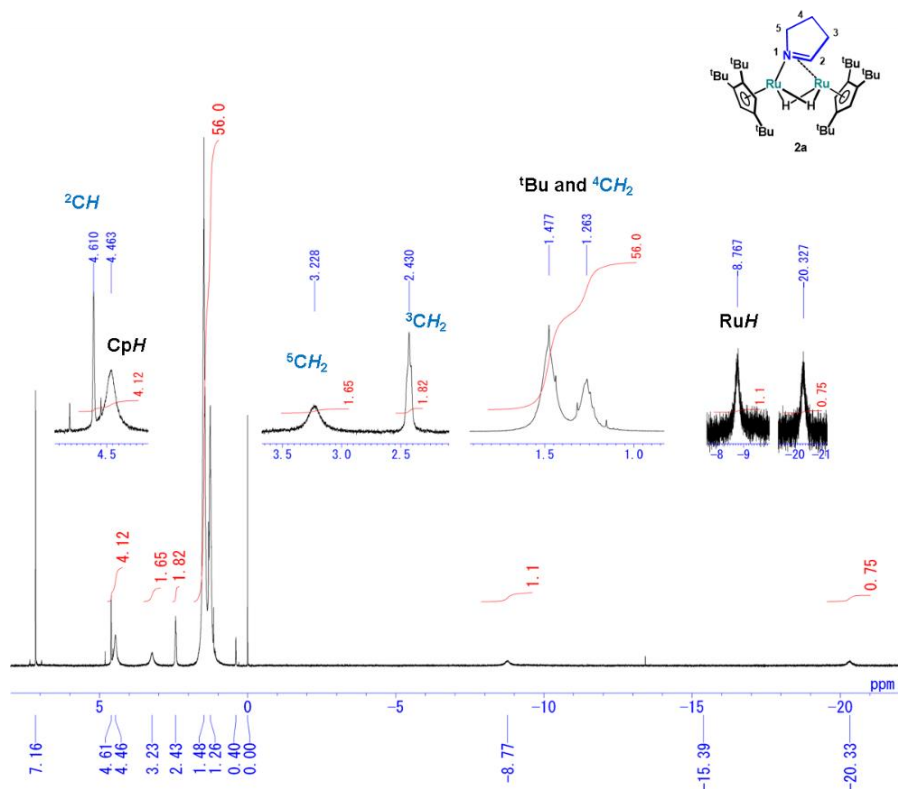

**Figure S1.**  $^1\text{H}$  NMR spectrum of **2a** (400 MHz,  $\text{C}_6\text{D}_6$ , 25 °C).

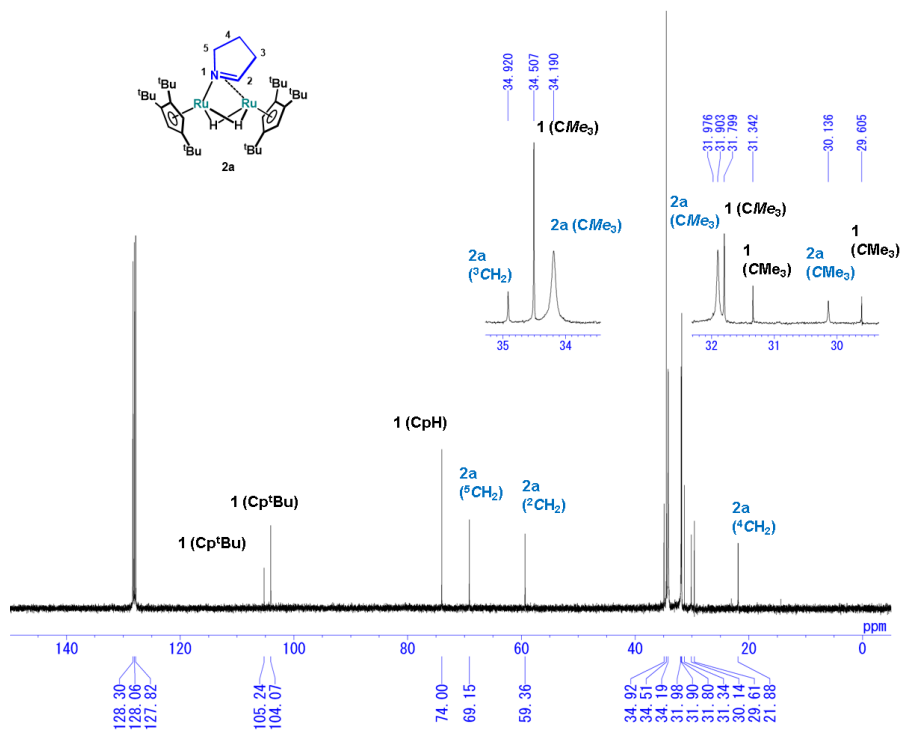

**Figure S2.**  $^{13}\text{C}\{^1\text{H}\}$  NMR spectrum of the mixture of **2a** and **1** in a molar ratio of 1/0.3. (100 MHz,  $\text{C}_6\text{D}_6$ , 25 °C).

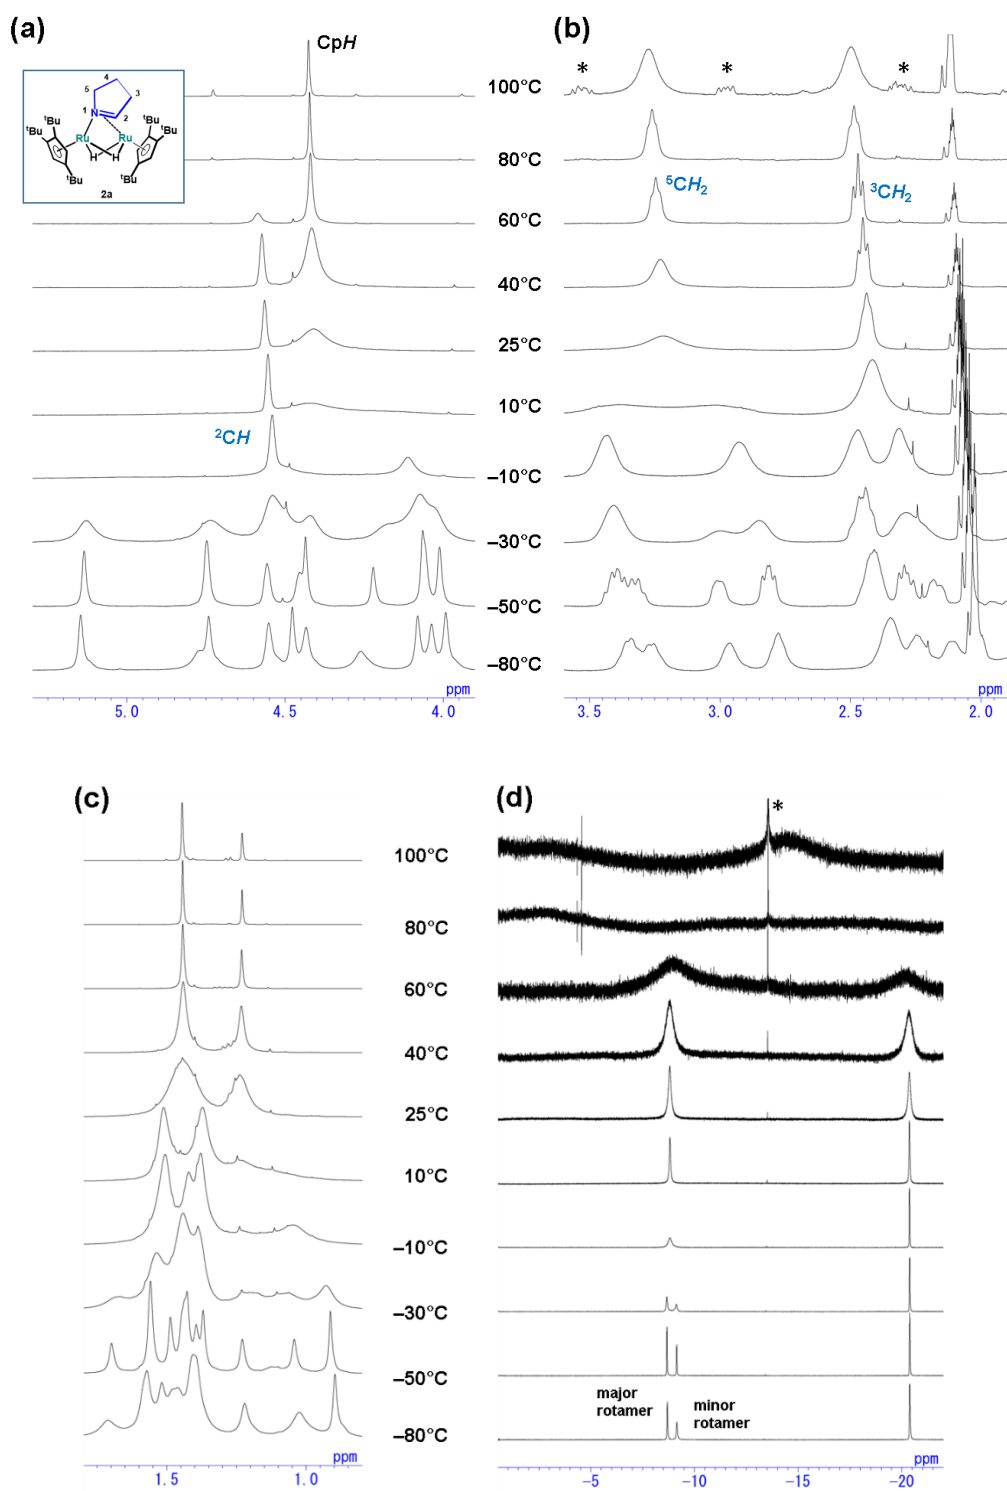

**Figure S3.** Variable temperature  $^1\text{H}$  NMR spectra of **2a** showing (a) CpH and methine, (b) methylene, (c)  $t\text{Bu}$ , and (d) hydride regions. Signals marked with an asterisk derived from **5a** and **1** formed from thermal decomposition of **2a**. (400 MHz, toluene- $d_8$ ).

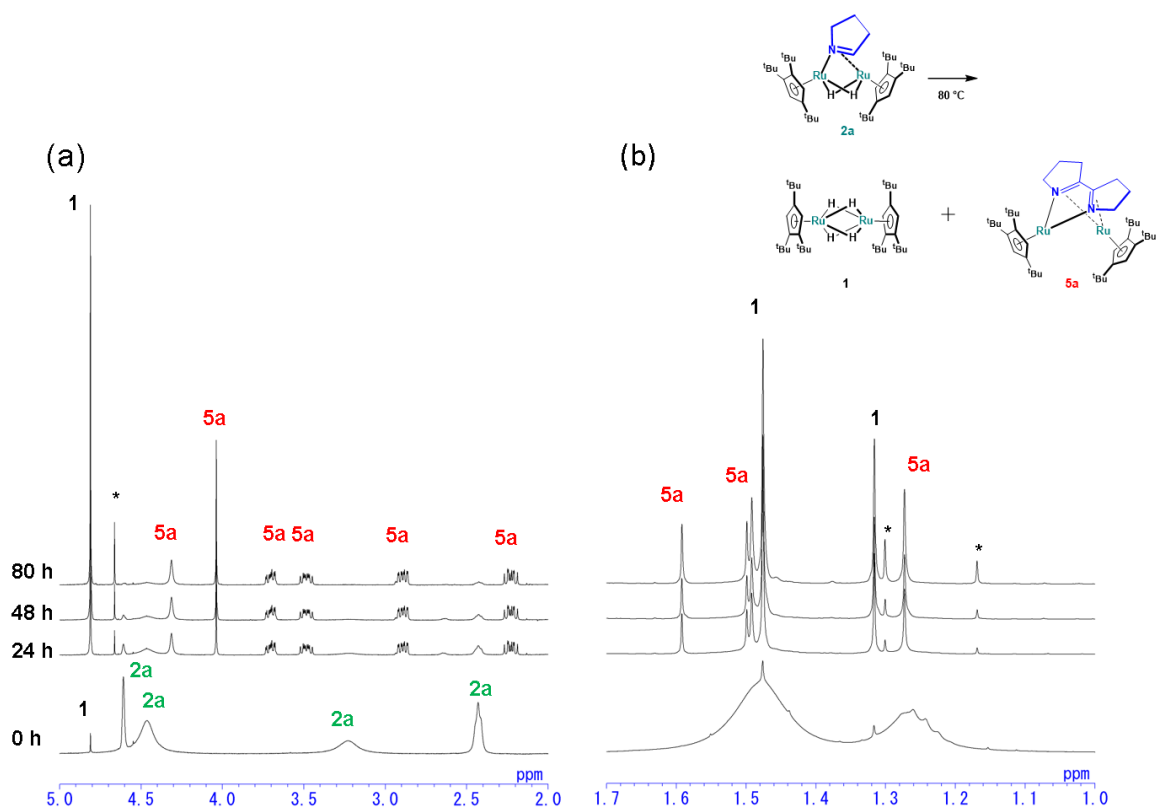

**Figure S4.**  $^1\text{H}$  NMR spectra of a mixture obtained from the thermolysis of **2a** at  $80^\circ\text{C}$  recorded after 0, 24, 48, and 80 h, showing (a) CpH and methylene and (b)  $t\text{Bu}$  regions. Signals marked with an asterisk were derived from unidentified byproducts (400 MHz,  $\text{C}_6\text{D}_6$ ,  $25^\circ\text{C}$ ).

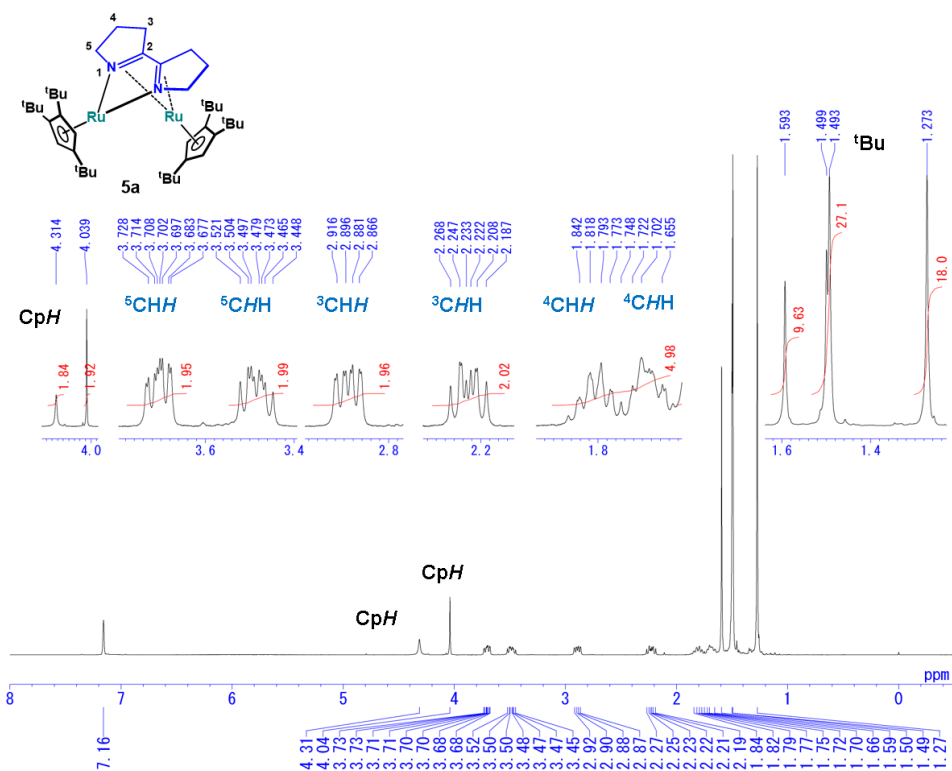

**Figure S5.**  $^1\text{H}$  NMR spectrum of **5a** (400 MHz,  $\text{C}_6\text{D}_6$ , 25 °C.)

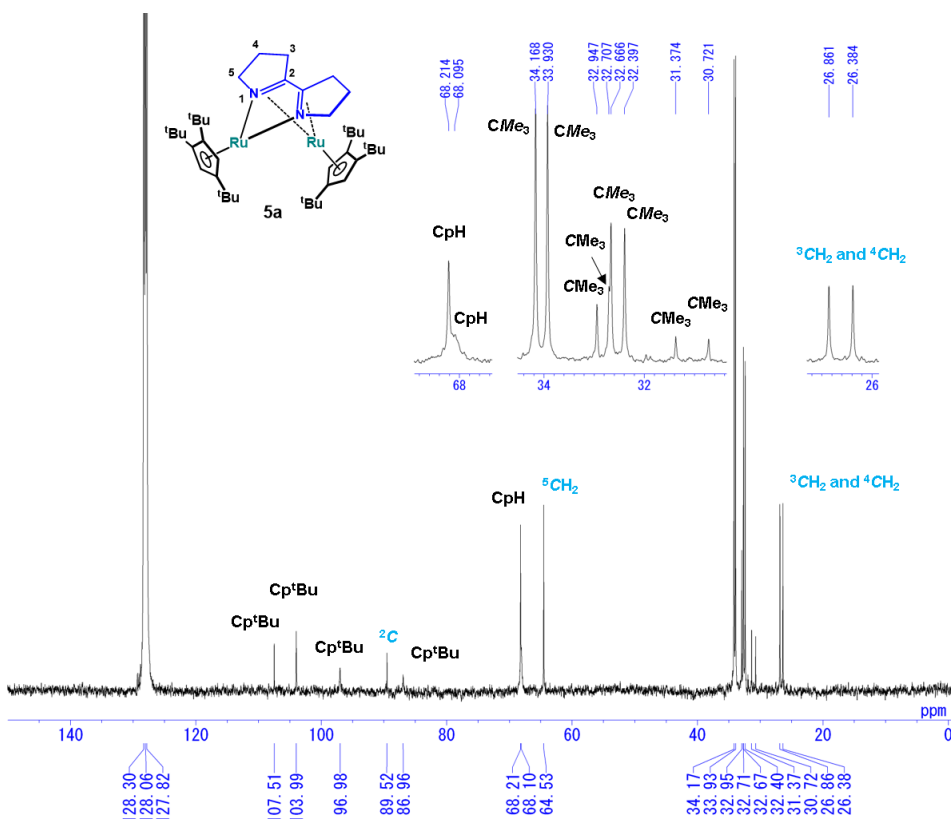

**Figure S6.**  $^{13}\text{C}\{^1\text{H}\}$  NMR spectrum of the mixture of **5a** (100 MHz,  $\text{C}_6\text{D}_6$ , 25 °C.)

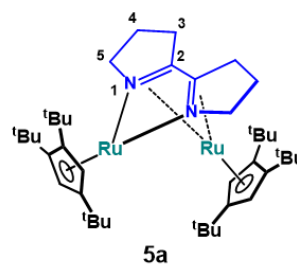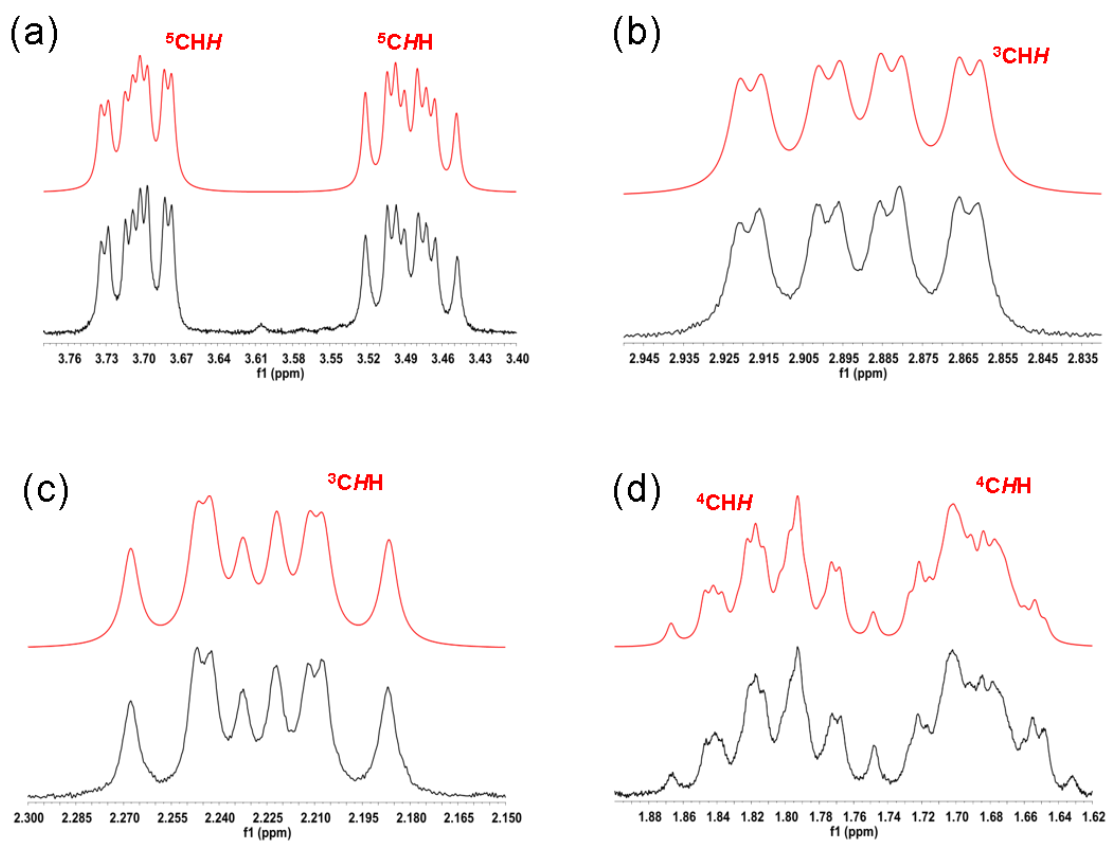

**Figure S7.** Shapes of  $^1\text{H}$  NMR signals derived from the methylene protons of the  $\mu\text{-}\eta^4\text{-}\alpha$ -diimine moiety of **5a** (black) and their simulated signals (red) (400 MHz,  $\text{C}_6\text{D}_6$ , 25  $^\circ\text{C}$ ).

**Table S1.** Estimate coupling parameters for the simulation of **5a**.

|                       | Shift/ppm | Width | Coupling constant / Hz    |                           |                           |                           |                           |
|-----------------------|-----------|-------|---------------------------|---------------------------|---------------------------|---------------------------|---------------------------|
|                       |           |       | 3.704<br>( $\text{C}^5$ ) | 3.486<br>( $\text{C}^5$ ) | 2.890<br>( $\text{C}^3$ ) | 2.227<br>( $\text{C}^3$ ) | 1.806<br>( $\text{C}^4$ ) |
| $\text{C}^5\text{HH}$ | 3.704     | 2.60  |                           |                           |                           |                           |                           |
| $\text{C}^5\text{HH}$ | 3.486     | 2.50  | -12.60                    |                           |                           |                           |                           |
| $\text{C}^3\text{HH}$ | 2.890     | 2.50  | 0.00                      | 0.00                      |                           |                           |                           |
| $\text{C}^3\text{HH}$ | 2.227     | 2.50  | 0.00                      | 0.00                      | -14.02                    |                           |                           |
| $\text{C}^4\text{HH}$ | 1.806     | 2.50  | 7.80                      | 9.80                      | 7.90                      | 10.10                     |                           |
| $\text{C}^4\text{HH}$ | 1.690     | 2.50  | 2.40                      | 6.90                      | 2.20                      | 8.10                      | -12.00                    |

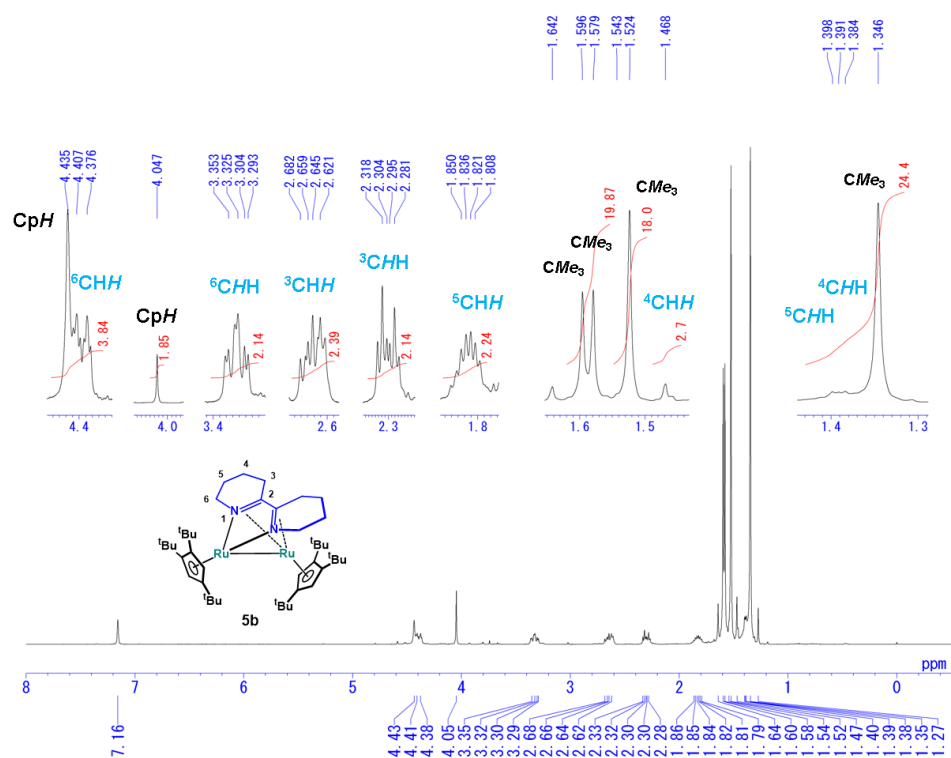

**Figure S8.**  $^1\text{H}$  NMR spectrum of **5b** (400 MHz,  $\text{C}_6\text{D}_6$ , 25  $^\circ\text{C}$ ).

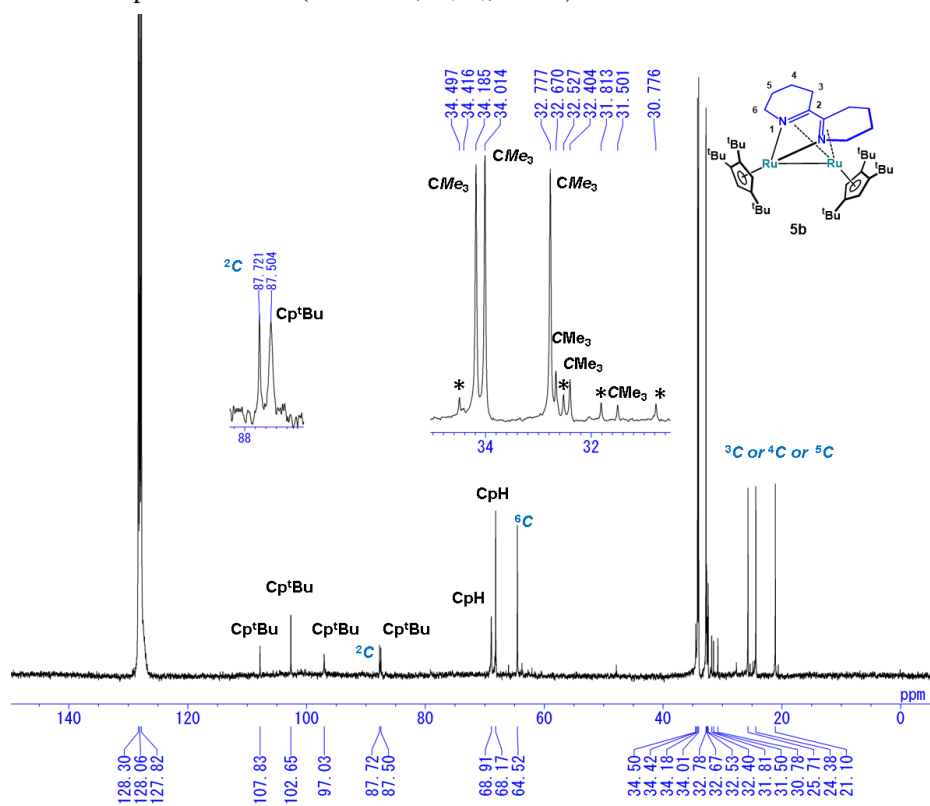

**Figure S9.**  $^{13}\text{C}\{^1\text{H}\}$  NMR spectrum of **5b**. Signals marked with an asterisk are derived from unidentified impurities (100 MHz,  $\text{C}_6\text{D}_6$ , 25  $^\circ\text{C}$ ).

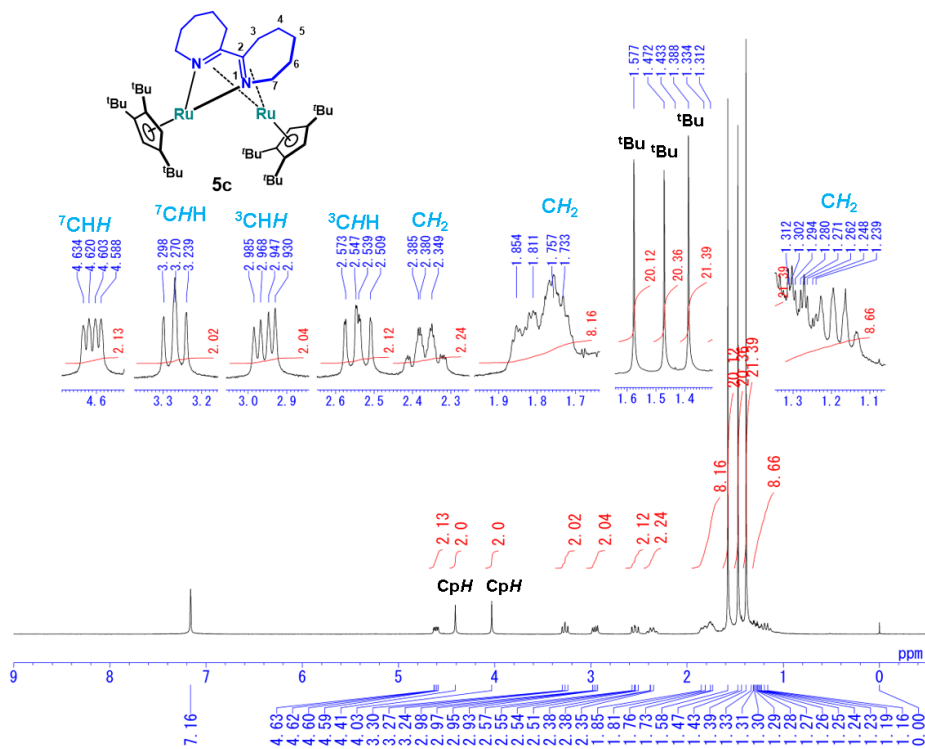

Figure S10.  $^1\text{H}$  NMR spectrum of **5c** (400 MHz,  $\text{C}_6\text{D}_6$ ,  $80^\circ\text{C}$ ).

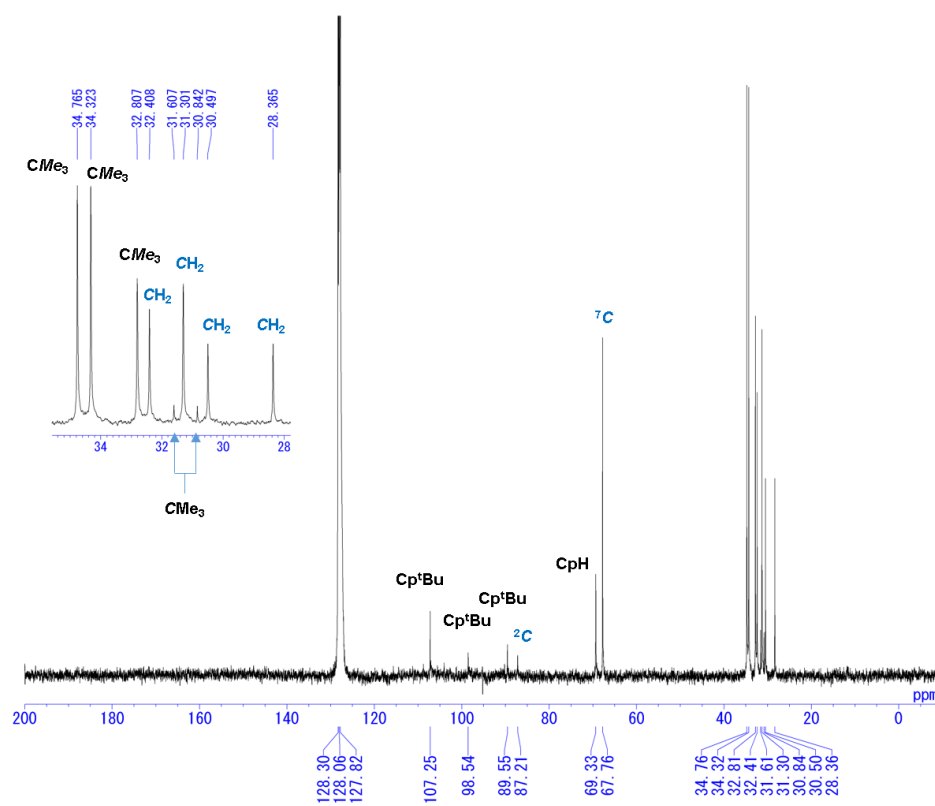

Figure S11.  $^{13}\text{C}\{^1\text{H}\}$  NMR spectrum of **5c**. One quaternary carbon signal of the  $t\text{Bu}$  groups could not be found, presumably due to the overlap with the methylene or methyl signals (100 MHz,  $\text{C}_6\text{D}_6$ ,  $80^\circ\text{C}$ ).



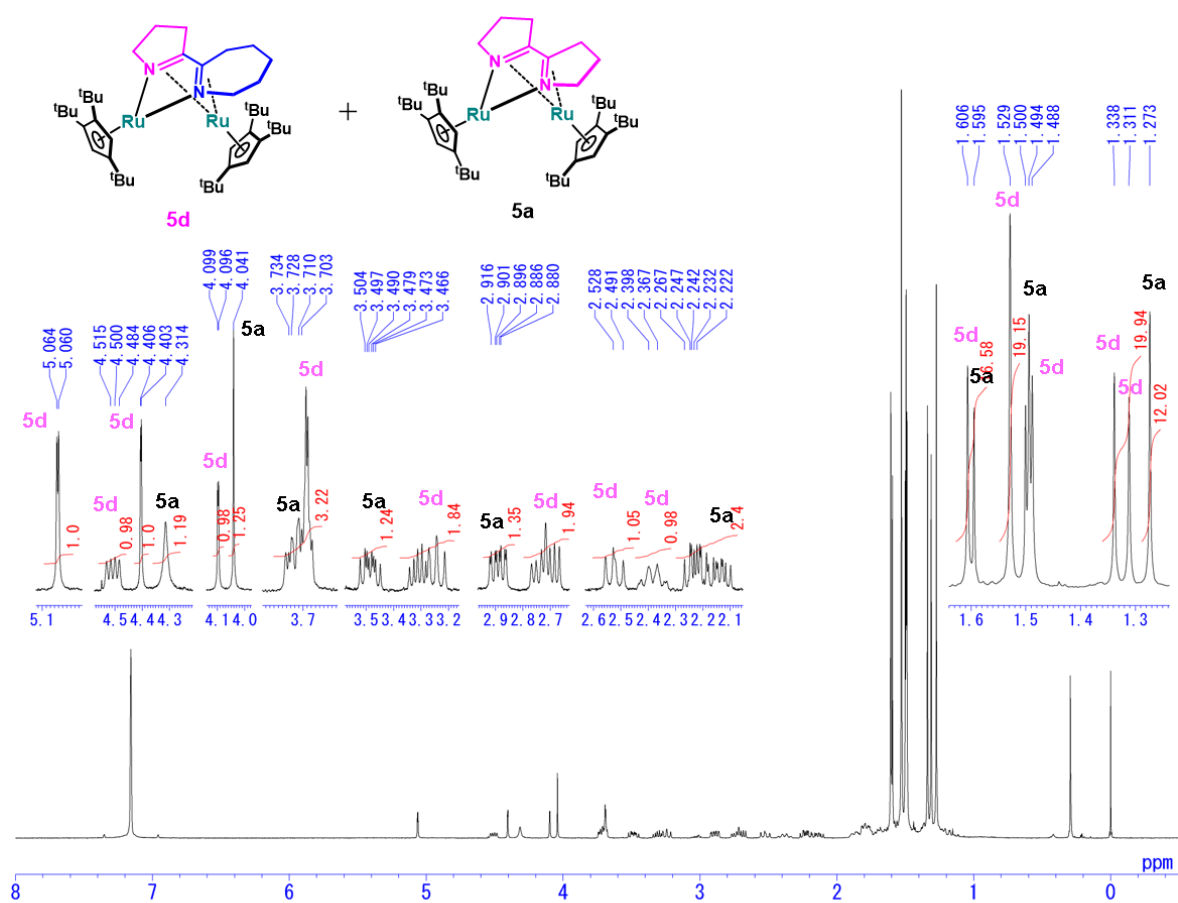

**Figure S12.**  $^1\text{H}$  NMR spectrum of a mixture of **5a** and **5d** in a molar ratio of 38:62 obtained from the reaction of **3c** with 1-pyrroline (400 MHz,  $\text{C}_6\text{D}_6$ , 25 °C)

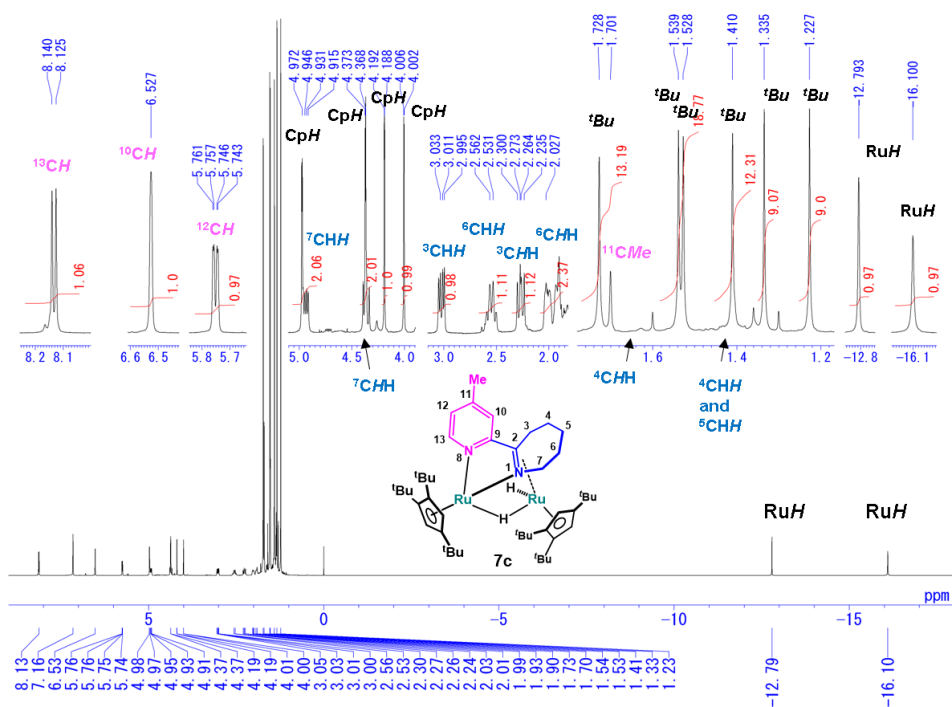

Figure S13.  $^1\text{H}$  NMR spectrum of **7c** (400 MHz,  $\text{C}_6\text{D}_6$ , 25  $^\circ\text{C}$ ).

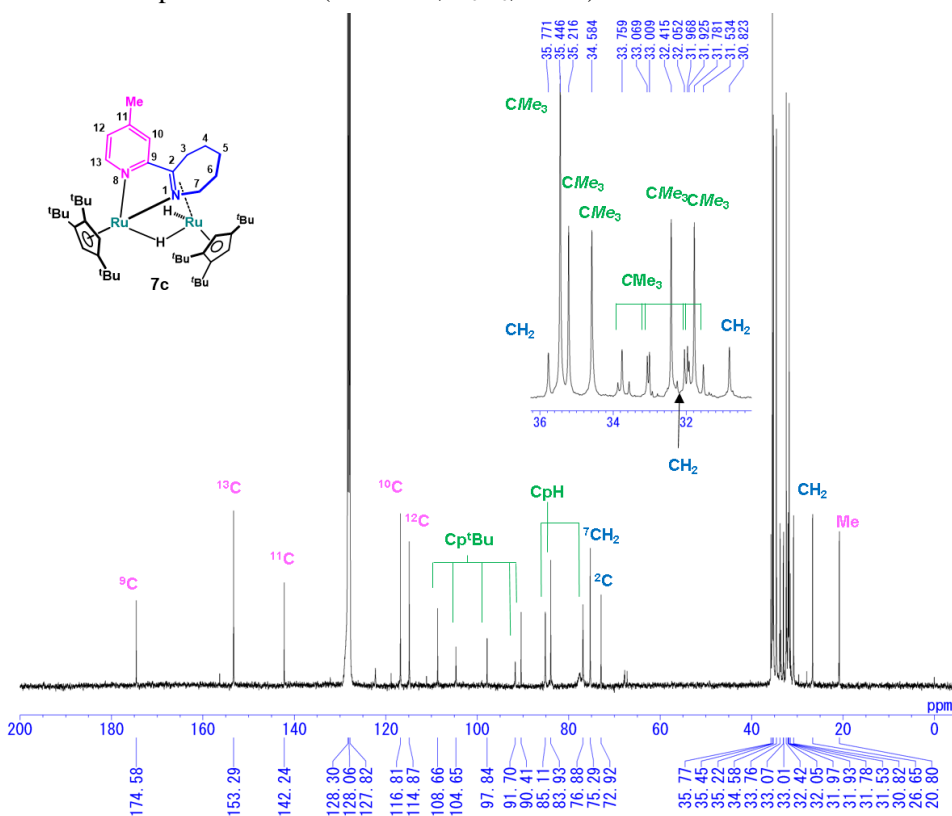

Figure S14.  $^{13}\text{C}\{^1\text{H}\}$  NMR spectrum of **7c** (100 MHz,  $\text{C}_6\text{D}_6$ , 25  $^\circ\text{C}$ ).

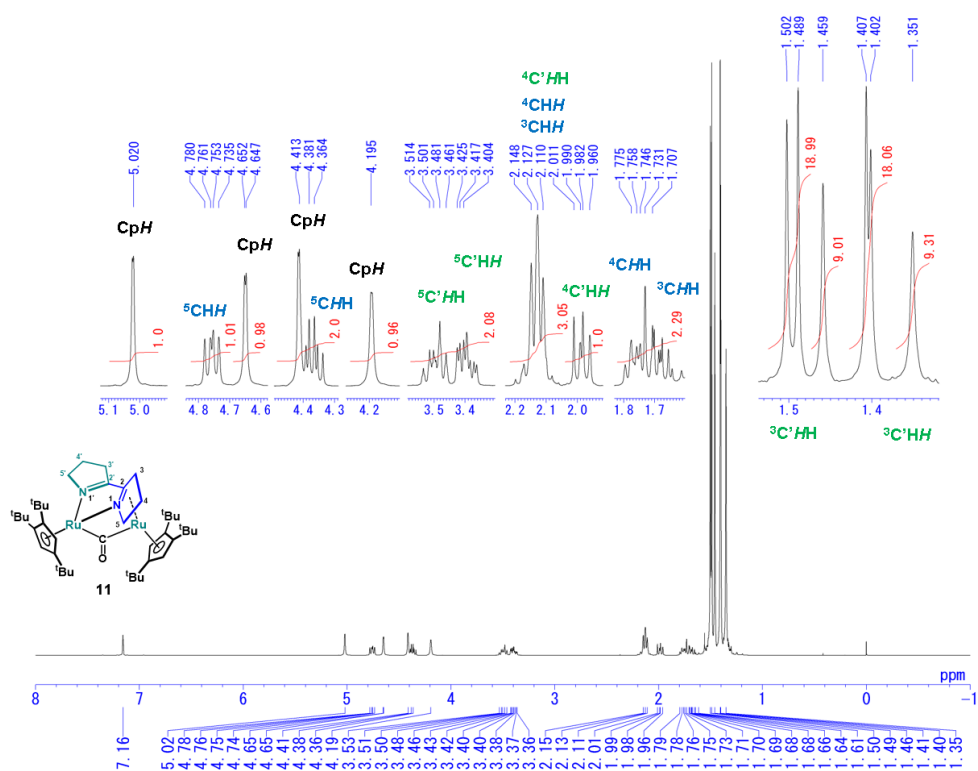

Figure S15.  $^1\text{H}$  NMR spectrum of **11** (400 MHz,  $\text{C}_6\text{D}_6$ , 25  $^\circ\text{C}$ ).

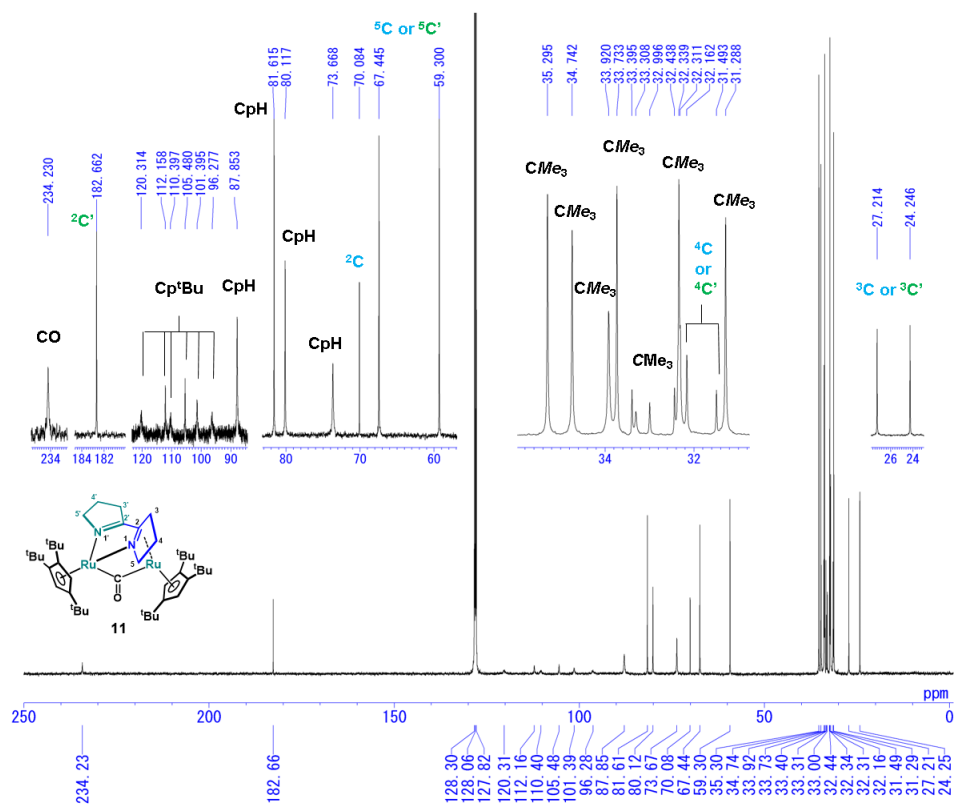

Figure S16.  $^{13}\text{C}\{^1\text{H}\}$  NMR spectrum of **11** (100 MHz,  $\text{C}_6\text{D}_6$ , 25  $^\circ\text{C}$ ).

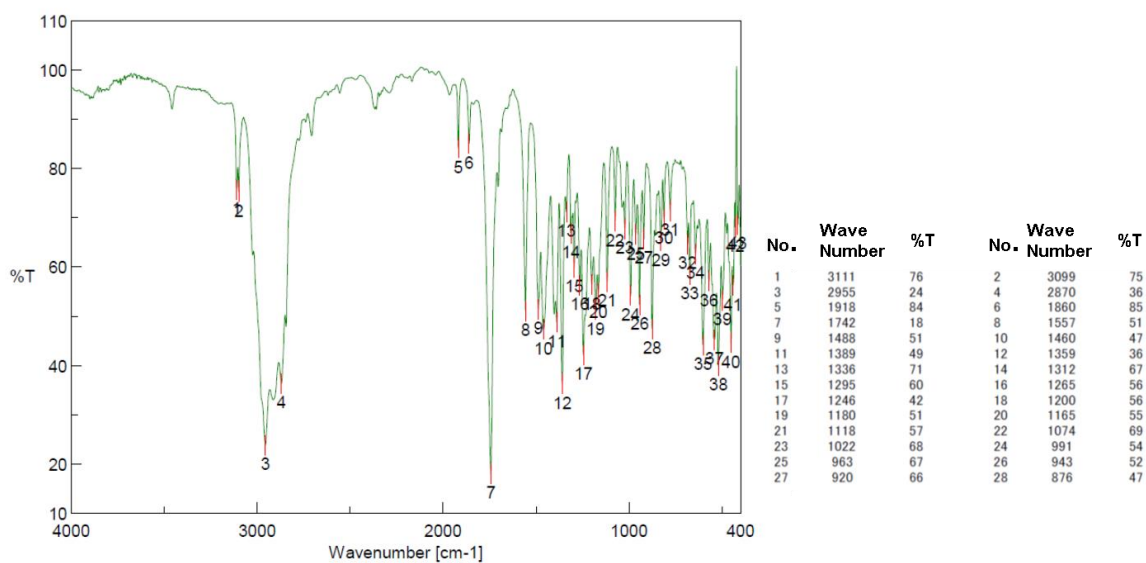

Figure S17. IR spectrum of **11** (KBr).

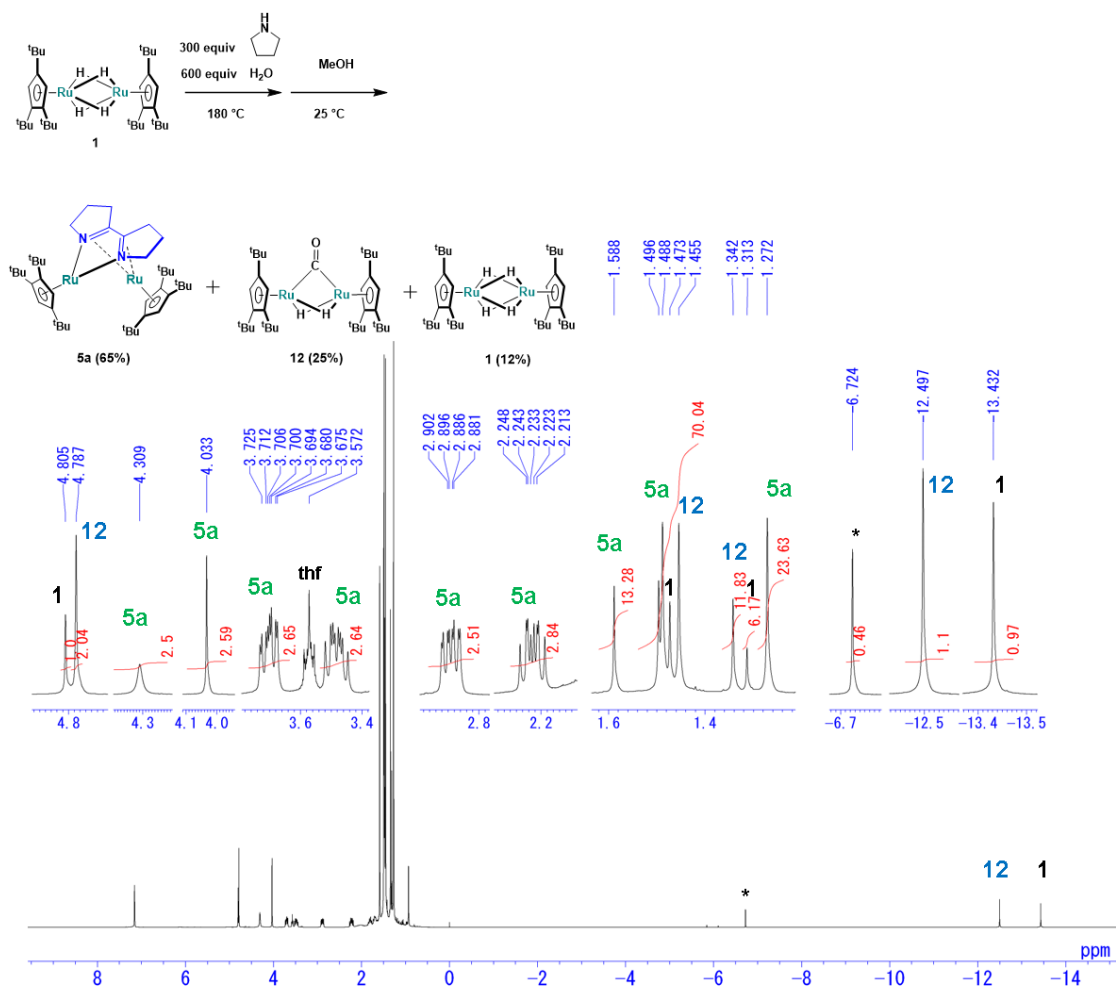

Figure S18. <sup>1</sup>H NMR spectrum of the mixture formed after the catalytic reaction of **1** with pyrrolidine. A hydrido signal marked with an asterisk is derived from an unidentified byproduct. (400 MHz, C<sub>6</sub>D<sub>6</sub>, 25 °C).

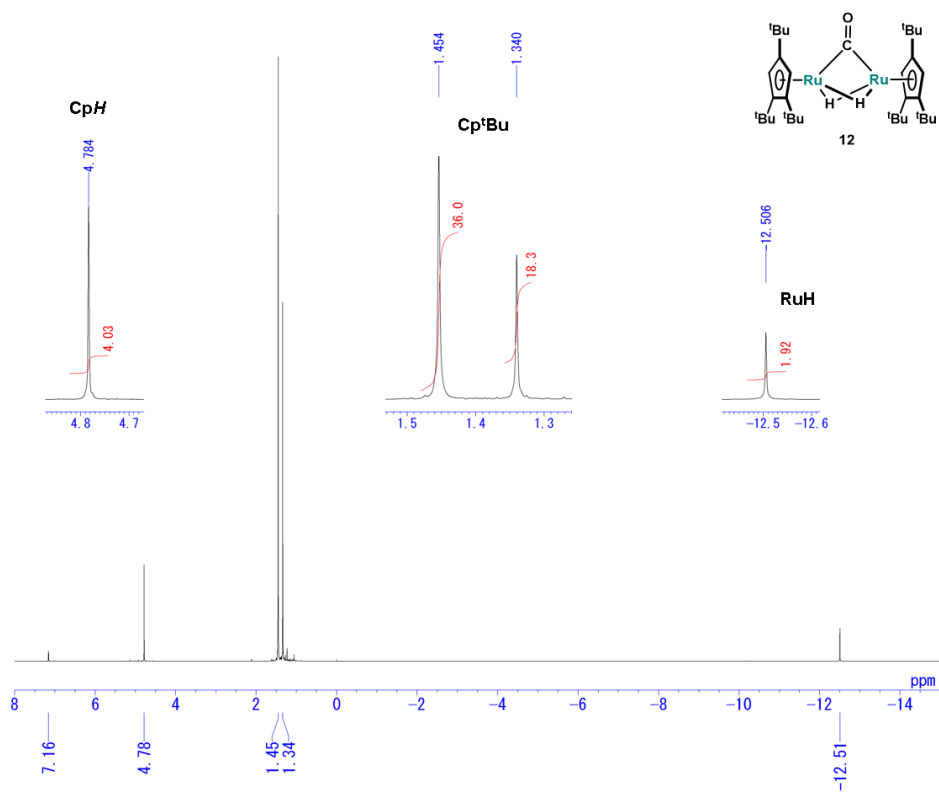

Figure S19.  $^1\text{H}$  NMR spectrum of **12** (400 MHz,  $\text{C}_6\text{D}_6$ , 25  $^\circ\text{C}$ ).

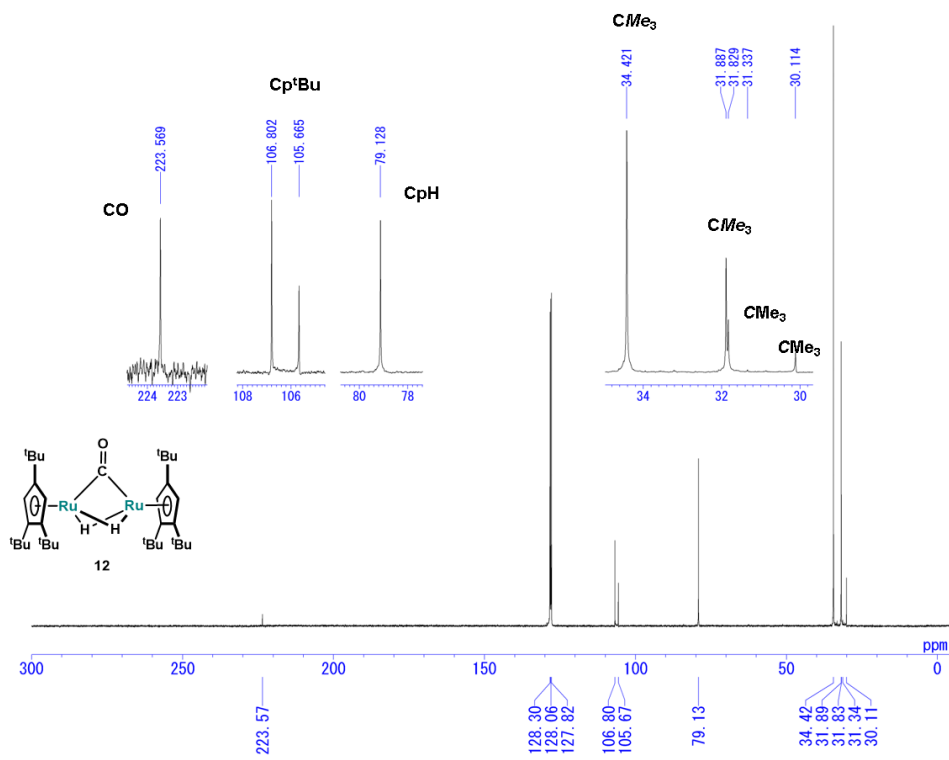

Figure S20.  $^{13}\text{C}\{^1\text{H}\}$  NMR spectrum of **12** (100 MHz,  $\text{C}_6\text{D}_6$ , 25  $^\circ\text{C}$ ).

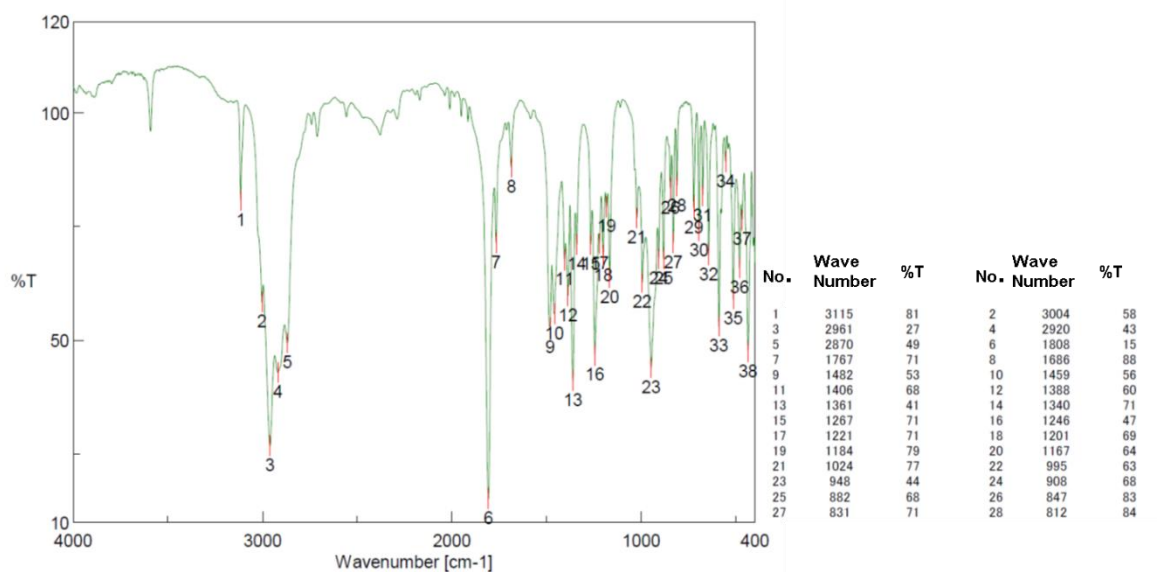

Figure S21. IR spectrum of **12** (KBr).

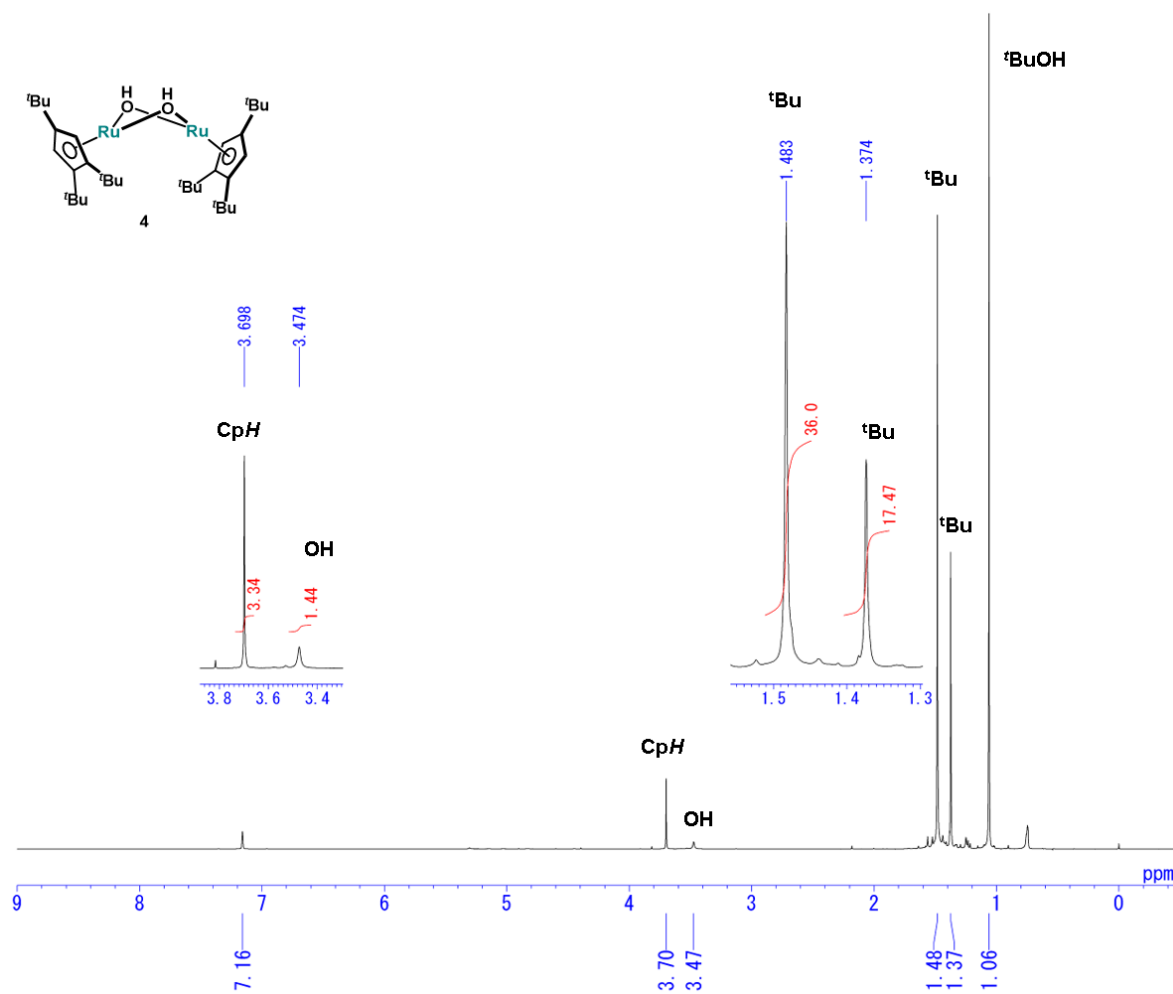

Figure S22. <sup>1</sup>H NMR spectrum of **4** (400 MHz, C<sub>6</sub>D<sub>6</sub>, 25 °C).

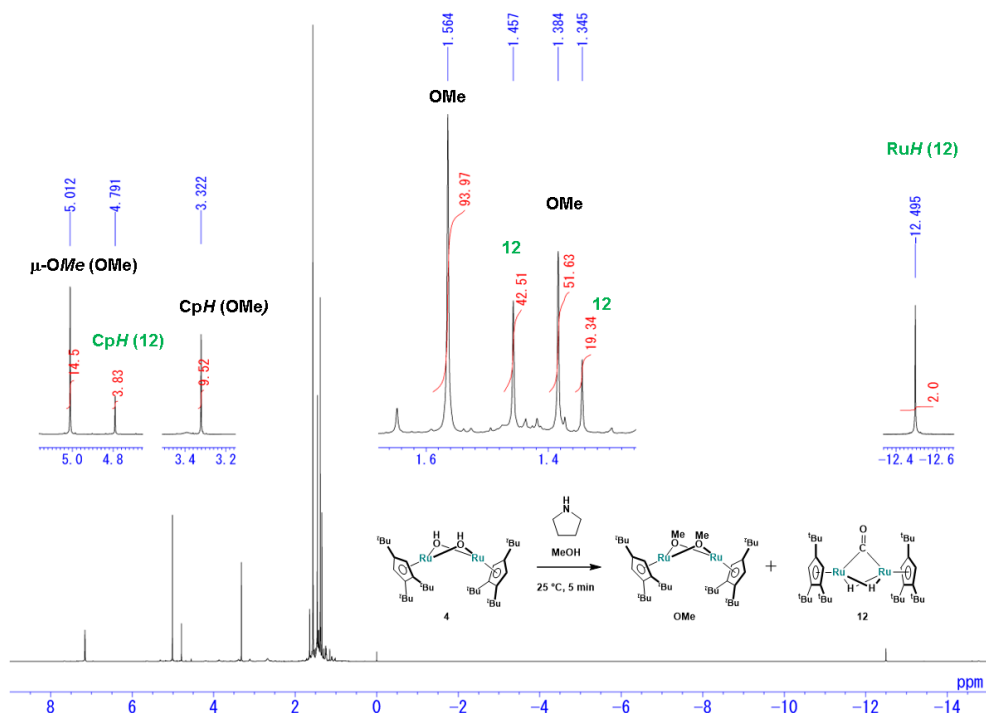

**Figure S23.**  $^1\text{H}$  NMR spectrum of the mixture obtained from the reaction of **4** with MeOH min in the presence of pyrrolidine (400 MHz,  $\text{C}_6\text{D}_6$ , 25 °C).

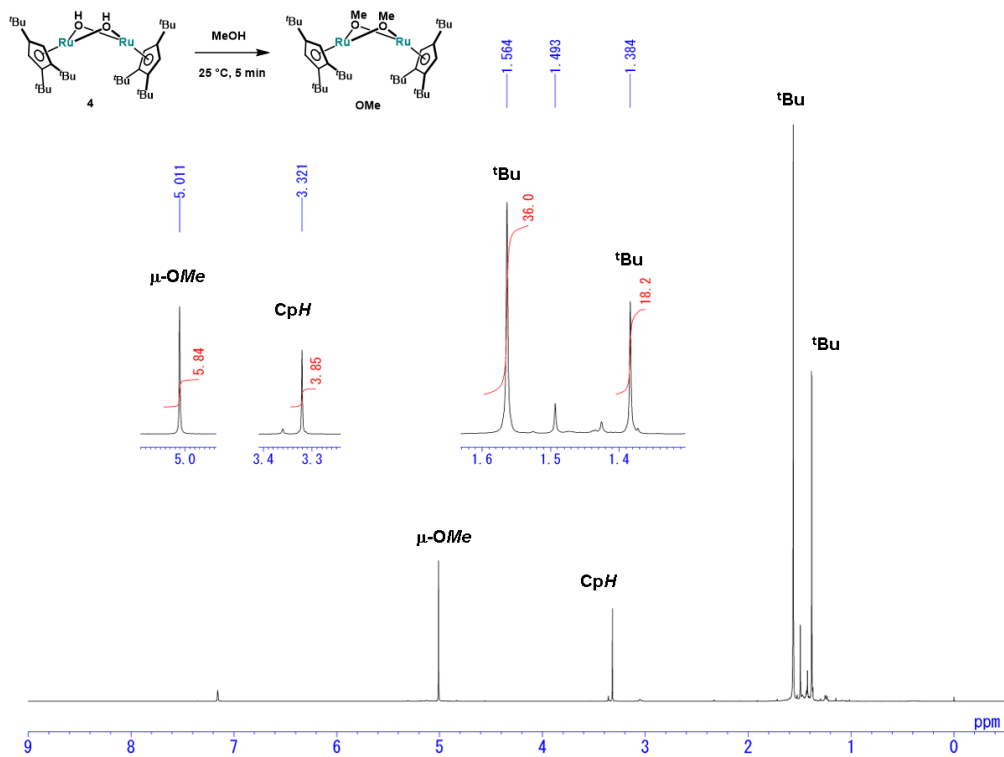

**Figure S24.**  $^1\text{H}$  NMR spectrum of the mixture obtained from the reaction of **4** with MeOH (400 MHz,  $\text{C}_6\text{D}_6$ , 25 °C).

## 2. Crystal data and results of XRD studies

**Table S2.** Crystallographic Data for **2a**, **5a**, **5b**, **5c**, **5d**, **7c**, **11**, and **12**.

|                                                              | <b>2a</b>                                        | <b>5a</b>                                                      | <b>5b</b>                                                      | <b>5c</b>                                                      |
|--------------------------------------------------------------|--------------------------------------------------|----------------------------------------------------------------|----------------------------------------------------------------|----------------------------------------------------------------|
| <b>(a) Crystal data</b>                                      |                                                  |                                                                |                                                                |                                                                |
| Empirical formula                                            | C <sub>38</sub> H <sub>67</sub> NRu <sub>2</sub> | C <sub>42</sub> H <sub>70</sub> N <sub>2</sub> Ru <sub>2</sub> | C <sub>44</sub> H <sub>74</sub> N <sub>2</sub> Ru <sub>2</sub> | C <sub>46</sub> H <sub>78</sub> N <sub>2</sub> Ru <sub>2</sub> |
| Formula weight                                               | 740.06                                           | 805.14                                                         | 833.19                                                         | 861.24                                                         |
| Crystal description                                          | Block                                            | Block                                                          | Block                                                          | Block                                                          |
| Crystal color                                                | Purple                                           | Orange                                                         | Orange                                                         | Red                                                            |
| Crystal size (mm)                                            | 0.176×0.149×0.109                                | 0.173×0.159×0.106                                              | 0.321×0.171×0.125                                              | 0.274×0.149×0.115                                              |
| Crystallizing solution                                       | <i>n</i> -hexane (−30 °C)                        | THF (25 °C)                                                    | <i>n</i> -hexane (−30 °C)                                      | <i>n</i> -hexane (0 °C)                                        |
| Crystal system                                               | Triclinic                                        | Monoclinic                                                     | Orthorhombic                                                   | Monoclinic                                                     |
| Space group                                                  | <i>P</i> -1(#2)                                  | <i>P</i> 2 <sub>1</sub> / <i>n</i> (#14)                       | <i>P</i> bca (#61)                                             | <i>C</i> 2/ <i>c</i> (#15)                                     |
| <i>a</i> (Å)                                                 | 10.7174(4)                                       | 10.5579(5)                                                     | 16.9579(4)                                                     | 14.6002(9)                                                     |
| <i>b</i> (Å)                                                 | 11.7914(6)                                       | 33.9623(12)                                                    | 17.0098(5)                                                     | 16.8492(11)                                                    |
| <i>c</i> (Å)                                                 | 15.5572(6)                                       | 11.0622(5)                                                     | 28.8179(8)                                                     | 18.1756(10)                                                    |
| $\alpha$ (°)                                                 | 106.892(2)                                       |                                                                |                                                                |                                                                |
| $\beta$ (°)                                                  | 90.1440(10)                                      | 97.3520(10)                                                    |                                                                | 99.985(2)                                                      |
| $\gamma$ (°)                                                 | 100.581(2)                                       |                                                                |                                                                |                                                                |
| Volume (Å <sup>3</sup> )                                     | 1845.93(14)                                      | 3934.0(3)                                                      | 8312.5(4)                                                      | 4403.5(5)                                                      |
| Z value                                                      | 2                                                | 4                                                              | 8                                                              | 4                                                              |
| <i>D</i> <sub>calc</sub> (g/cm <sup>3</sup> )                | 1.331                                            | 1.359                                                          | 1.332                                                          | 1.299                                                          |
| Measurement temp. (°C)                                       | −150                                             | −150                                                           | −130                                                           | −150                                                           |
| $\mu$ (MoK $\alpha$ ) (mm <sup>−1</sup> )                    | 0.843                                            | 0.798                                                          | 0.758                                                          | 0.717                                                          |
| <b>(b) Intensity measurements</b>                            |                                                  |                                                                |                                                                |                                                                |
| Diffractionmeter                                             | Rigaku R-AXIS<br>RAPID                           | Rigaku R-AXIS<br>RAPID                                         | Rigaku R-AXIS<br>RAPID                                         | Rigaku R-AXIS<br>RAPID                                         |
| Radiation                                                    | MoK $\alpha$<br>( $\lambda$ = 0.71069 Å)         | MoK $\alpha$<br>( $\lambda$ = 0.71069 Å)                       | MoK $\alpha$<br>( $\lambda$ = 0.71069 Å)                       | MoK $\alpha$<br>( $\lambda$ = 0.71069 Å)                       |
| Monochromator                                                | Graphite                                         | Graphite                                                       | Graphite                                                       | Graphite                                                       |
| 2 $\theta$ <sub>max</sub> (°)                                | 55                                               | 55                                                             | 55                                                             | 55                                                             |
| Reflections collected                                        | 18552                                            | 38688                                                          | 78815                                                          | 21769                                                          |
| Independent reflections                                      | 8412 ( <i>R</i> <sub>int</sub> = 0.0371)         | 9009 ( <i>R</i> <sub>int</sub> = 0.0661)                       | 9473 ( <i>R</i> <sub>int</sub> = 0.0623)                       | 5033 ( <i>R</i> <sub>int</sub> = 0.0826)                       |
| Reflections observed (>2 $\sigma$ )                          | 7232                                             | 7227                                                           | 7749                                                           | 3623                                                           |
| Abs. Correction type                                         | Empirical                                        | Empirical                                                      | Empirical                                                      | Numerical                                                      |
| Abs. Transmission                                            | 0.5642 (min)<br>1.0000 (max)                     | 0.5729 (min)<br>1.0000 (max)                                   | 0.5701 (min)<br>1.0000 (max)                                   | 0.8612 (min)<br>1.0000 (max)                                   |
| <b>(c) Refinement (Shelxl-2018/3)</b>                        |                                                  |                                                                |                                                                |                                                                |
| <i>R</i> <sub>1</sub> ( <i>I</i> > 2 $\sigma$ ( <i>I</i> ))  | 0.0283                                           | 0.0499                                                         | 0.0358                                                         | 0.0519                                                         |
| <i>wR</i> <sub>2</sub> ( <i>I</i> > 2 $\sigma$ ( <i>I</i> )) | 0.0607                                           | 0.0913                                                         | 0.0819                                                         | 0.1131                                                         |
| <i>R</i> <sub>1</sub> (all data)                             | 0.0350                                           | 0.0672                                                         | 0.0487                                                         | 0.0789                                                         |
| <i>wR</i> <sub>2</sub> (all data)                            | 0.0639                                           | 0.0987                                                         | 0.0870                                                         | 0.1503                                                         |
| Data/Restraints/Parameters                                   | 8412 / 0 / 424                                   | 9009 / 0 / 433                                                 | 9473 / 0 / 483                                                 | 5033 / 0 / 275                                                 |
| GOF                                                          | 1.054                                            | 1.048                                                          | 1.022                                                          | 1.108                                                          |
| Largest diff. Peak and hole<br>(e. Å <sup>−3</sup> )         | 0.975 and −0.575                                 | 3.070 and −1.694                                               | 1.201 and −0.926                                               | 1.139 and −1.401                                               |
| CCDC deposition number                                       | 2296342                                          | 2296343                                                        | 2296344                                                        | 2296345                                                        |



**Table S2.** Crystallographic Data for **2a**, **5a**, **5b**, **5c**, **5d**, **7c**, **11**, and **12**. (continued)

|                                                              | <b>5d</b>                                                      | <b>7c</b>                                                      | <b>11</b>                                                       | <b>12</b>                                        |
|--------------------------------------------------------------|----------------------------------------------------------------|----------------------------------------------------------------|-----------------------------------------------------------------|--------------------------------------------------|
| <b>(a) Crystal data</b>                                      |                                                                |                                                                |                                                                 |                                                  |
| Empirical formula                                            | C <sub>44</sub> H <sub>74</sub> N <sub>2</sub> Ru <sub>2</sub> | C <sub>46</sub> H <sub>76</sub> N <sub>2</sub> Ru <sub>2</sub> | C <sub>43</sub> H <sub>70</sub> N <sub>2</sub> ORu <sub>2</sub> | C <sub>35</sub> H <sub>60</sub> ORu <sub>2</sub> |
| Formula weight                                               | 833.19                                                         | 859.22                                                         | 833.15                                                          | 698.97                                           |
| Crystal description                                          | Block                                                          | Block                                                          | Platelet                                                        | Block                                            |
| Crystal color                                                | Orange                                                         | Orange                                                         | Brown                                                           | Brown                                            |
| Crystal size (mm)                                            | 0.108×0.075×0.061                                              | 0.176×0.162×0.150                                              | 0.238×0.225×0.097                                               | 0.344×0.294×0.152                                |
| Crystalizing solution                                        | acetone (0 °C)                                                 | acetone (25 °C)                                                | acetone (25 °C)                                                 | acetone (25 °C)                                  |
| Crystal system                                               | Monoclinic                                                     | Monoclinic                                                     | Monoclinic                                                      | Monoclinic                                       |
| Space group                                                  | <i>P</i> 2 <sub>1</sub> / <i>n</i> (#14)                       | <i>P</i> 2 <sub>1</sub> / <i>n</i> (#14)                       | <i>P</i> 2 <sub>1</sub> / <i>n</i> (#14)                        | <i>P</i> 2 <sub>1</sub> / <i>n</i> (#14)         |
| <i>a</i> (Å)                                                 | 10.7555(3)                                                     | 18.4357(8)                                                     | 12.2704(5)                                                      | 11.7256(3)                                       |
| <i>b</i> (Å)                                                 | 35.2527(11)                                                    | 11.3913(6)                                                     | 16.9468(7)                                                      | 10.3388(4)                                       |
| <i>c</i> (Å)                                                 | 11.1031(4)                                                     | 20.9382(10)                                                    | 20.4301(9)                                                      | 28.2062(9)                                       |
| $\alpha$ (°)                                                 |                                                                |                                                                |                                                                 |                                                  |
| $\beta$ (°)                                                  | 97.6250(10)                                                    | 102.3070(10)                                                   | 104.068(2)                                                      | 91.8140(10)                                      |
| $\gamma$ (°)                                                 |                                                                |                                                                |                                                                 |                                                  |
| Volume (Å <sup>3</sup> )                                     | 4172.6(2)                                                      | 4296.1(4)                                                      | 4120.9(3)                                                       | 3417.69(19)                                      |
| Z value                                                      | 4                                                              | 4                                                              | 4                                                               | 4                                                |
| <i>D</i> <sub>calc</sub> (g/cm <sup>3</sup> )                | 1.328                                                          | 1.328                                                          | 1.343                                                           | 1.358                                            |
| Measurement temp. (°C)                                       | −130                                                           | −150                                                           | −150                                                            | −150                                             |
| $\mu$ (MoK $\alpha$ ) (mm <sup>−1</sup> )                    | 0.755                                                          | 0.735                                                          | 0.766                                                           | 0.907                                            |
| <b>(b) Intensity measurements</b>                            |                                                                |                                                                |                                                                 |                                                  |
| Diffractionmeter                                             | Rigaku R-AXIS<br>RAPID                                         | Rigaku R-AXIS<br>RAPID                                         | Rigaku R-AXIS<br>RAPID                                          | Rigaku R-AXIS<br>RAPID                           |
| Radiation                                                    | MoK $\alpha$<br>( $\lambda = 0.71069$ Å)                       | MoK $\alpha$<br>( $\lambda = 0.71069$ Å)                       | MoK $\alpha$<br>( $\lambda = 0.71069$ Å)                        | MoK $\alpha$<br>( $\lambda = 0.71069$ Å)         |
| Monochromator                                                | Graphite                                                       | Graphite                                                       | Graphite                                                        | Graphite                                         |
| 2 $\theta$ <sub>max</sub> (°)                                | 55                                                             | 55                                                             | 55                                                              | 55                                               |
| Reflections collected                                        | 65797                                                          | 41821                                                          | 65343                                                           | 26962                                            |
| Independent reflections                                      | 9526 ( <i>R</i> <sub>int</sub> = 0.0911)                       | 9764 ( <i>R</i> <sub>int</sub> = 0.1012)                       | 9419 ( <i>R</i> <sub>int</sub> = 0.0736)                        | 6210 ( <i>R</i> <sub>int</sub> = 0.0383)         |
| Reflections observed (>2 $\sigma$ )                          | 7430                                                           | 6804                                                           | 7627                                                            | 5930                                             |
| Abs. Correction type                                         | Empirical                                                      | Empirical                                                      | Numerical                                                       | Empirical                                        |
| Abs. Transmission                                            | 0.7578 (min)<br>1.0000 (max)                                   | 0.5772 (min)<br>1.0000 (max)                                   | 0.7885 (min)<br>1.0000 (max)                                    | 0.7203 (min)<br>1.0000 (max)                     |
| <b>(c) Refinement (Shelxl-2018/3)</b>                        |                                                                |                                                                |                                                                 |                                                  |
| <i>R</i> <sub>1</sub> ( <i>I</i> > 2 $\sigma$ ( <i>I</i> ))  | 0.0457                                                         | 0.0466                                                         | 0.0350                                                          | 0.0205                                           |
| <i>wR</i> <sub>2</sub> ( <i>I</i> > 2 $\sigma$ ( <i>I</i> )) | 0.0950                                                         | 0.0910                                                         | 0.0818                                                          | 0.0524                                           |
| <i>R</i> <sub>1</sub> (all data)                             | 0.0657                                                         | 0.0753                                                         | 0.0472                                                          | 0.0216                                           |
| <i>wR</i> <sub>2</sub> (all data)                            | 0.1041                                                         | 0.1021                                                         | 0.0866                                                          | 0.0532                                           |
| Data/Restraints/Parameters                                   | 9526 / 0 / 451                                                 | 9764 / 0 / 478                                                 | 9419 / 0 / 487                                                  | 6210 / 0 / 416                                   |
| GOF                                                          | 1.068                                                          | 1.040                                                          | 1.056                                                           | 0.963                                            |
| Largest diff. Peak and hole<br>(e. Å <sup>−3</sup> )         | 1.538 and −1.258                                               | 0.858 and −0.928                                               | 1.180 and −0.954                                                | 0.387 and −0.310                                 |
| CCDC deposition number                                       | 2296346                                                        | 2296347                                                        | 2296348                                                         | 2296349                                          |

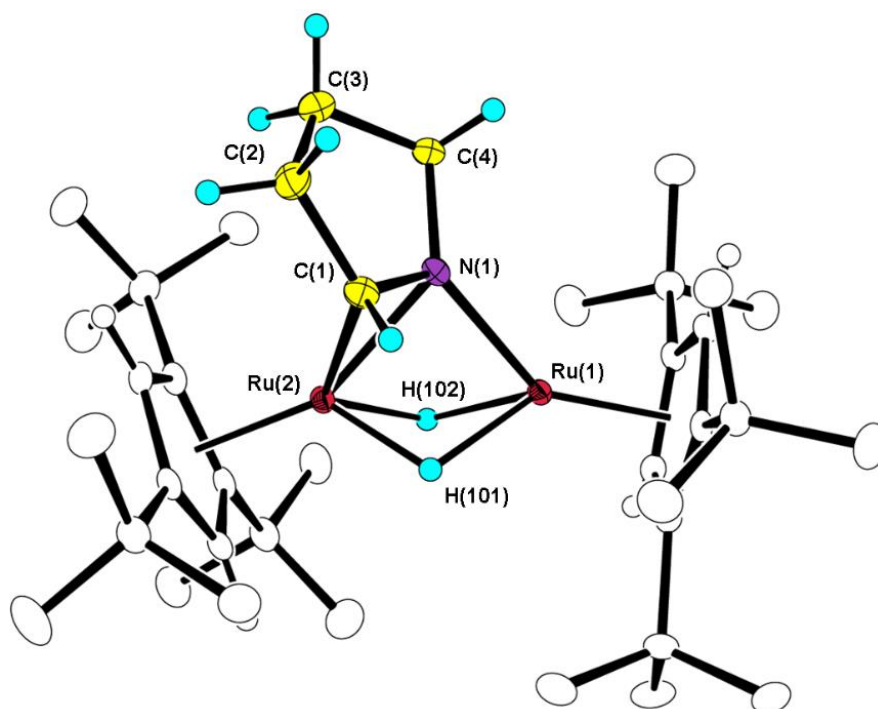

**Figure S25.** Molecular structures of **2a** with thermal ellipsoids at 30% probability. Hydrogen atoms in the <sup>t</sup>Bu groups were omitted for clarity.

**Table S3.** Selected bond lengths [Å] and angles [°] of **2a**.

|                   |                        |                        |                      |
|-------------------|------------------------|------------------------|----------------------|
| Ru1 N1 2.0554(17) | C2 C3 1.534(3)         | C1 Ru2 Ru1 77.79(6)    | C1 N1 Ru2 71.49(11)  |
| Ru1 Ru2 2.6290(3) | C3 C4 1.522(3)         | N1 Ru2 H101 74.6(8)    | C4 N1 Ru2 125.92(14) |
| Ru1 H101 1.81(2)  |                        | C1 Ru2 H101 77.5(8)    | Ru1 N1 Ru2 77.71(6)  |
| Ru1 H102 1.69(3)  | N1 Ru1 Ru2 52.48(5)    | Ru1 Ru2 H101 42.8(8)   | N1 C1 C2 109.92(18)  |
| Ru2 N1 2.1342(17) | N1 Ru1 H101 74.3(7)    | N1 Ru2 H102 79.4(9)    | N1 C1 Ru2 70.67(11)  |
| Ru2 C1 2.145(2)   | Ru2 Ru1 H101 39.2(7)   | C1 Ru2 H102 114.4(9)   | C2 C1 Ru2 123.61(15) |
| Ru2 H101 1.68(2)  | N1 Ru1 H102 81.6(9)    | Ru1 Ru2 H102 38.8(9)   | C1 C2 C3 103.68(18)  |
| Ru2 H102 1.68(3)  | Ru2 Ru1 H102 38.6(9)   | H101 Ru2 H102 66.9(12) | C4 C3 C2 103.53(19)  |
| N1 C1 1.387(3)    | H101 Ru1 H102 63.9(12) | C1 N1 C4 109.52(17)    | N1 C4 C3 105.63(18)  |
| N1 C4 1.477(3)    | N1 Ru2 C1 37.84(7)     | C1 N1 Ru1 121.47(14)   |                      |
| C1 C2 1.520(3)    | N1 Ru2 Ru1 49.81(5)    | C4 N1 Ru1 128.82(14)   |                      |

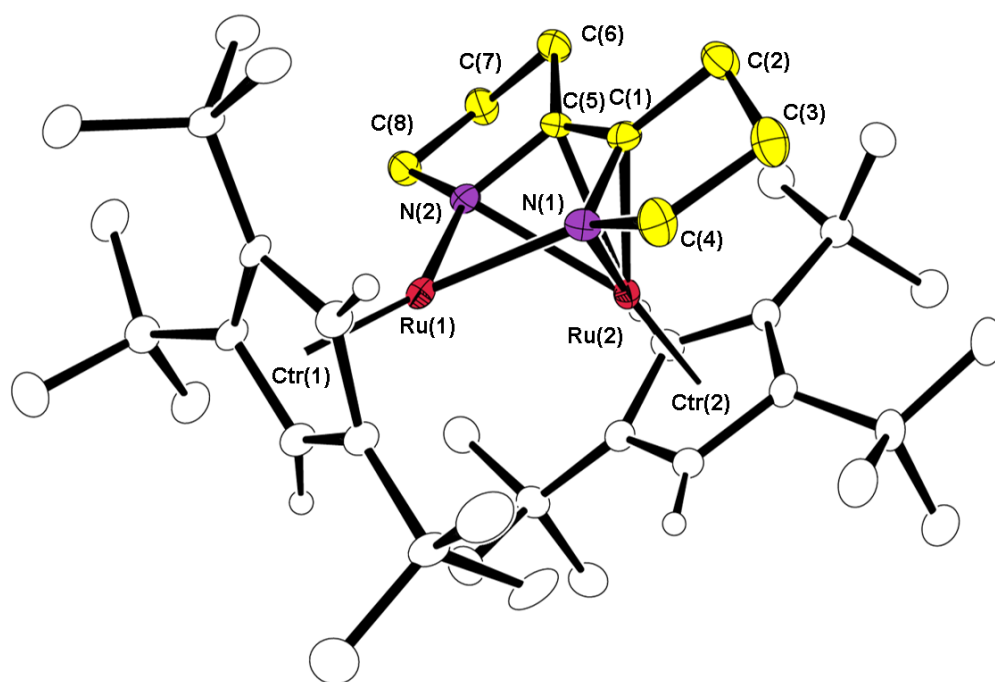

**Figure S26.** Molecular structures of **5a** with thermal ellipsoids at 30% probability. Hydrogen atoms in the <sup>t</sup>Bu groups and  $\alpha$ -diimine moiety were omitted for clarity.

**Table S4.** Selected bond lengths [ $\text{\AA}$ ] and angles [ $^\circ$ ] of **5a**.

|                   |                      |                      |                    |
|-------------------|----------------------|----------------------|--------------------|
| Ru1 N1 2.015(3)   | C6 C7 1.532(6)       | C1 N1 C4 107.6(3)    | C5 C1 Ru2 71.0(2)  |
| Ru1 N2 2.058(3)   | C7 C8 1.518(6)       | C1 N1 Ru1 120.2(3)   | C2 C1 Ru2 133.1(3) |
| Ru1 Ru2 2.9274(4) |                      | C4 N1 Ru1 128.4(3)   | C1 C2 C3 101.6(3)  |
| Ru2 C5 2.178(4)   | N1 Ru1 N2 74.03(13)  | C1 N1 Ru2 69.7(2)    | C2 C3 C4 103.8(3)  |
| Ru2 C1 2.189(4)   | N1 Ru1 Ru2 49.81(9)  | C4 N1 Ru2 129.8(3)   | N1 C4 C3 106.1(3)  |
| Ru2 N2 2.235(3)   | N2 Ru1 Ru2 49.59(9)  | Ru1 N1 Ru2 86.78(12) | C1 C5 N2 112.4(3)  |
| Ru2 N1 2.240(3)   | C5 Ru2 C1 37.19(14)  | C5 N2 C8 105.9(3)    | C1 C5 C6 134.5(4)  |
| N1 C1 1.387(5)    | C5 Ru2 N2 36.82(13)  | C5 N2 Ru1 118.5(2)   | N2 C5 C6 112.8(3)  |
| N1 C4 1.474(5)    | C1 Ru2 N2 63.13(13)  | C8 N2 Ru1 133.0(3)   | C1 C5 Ru2 71.8(2)  |
| N2 C5 1.395(5)    | C5 Ru2 N1 63.04(13)  | C5 N2 Ru2 69.4(2)    | N2 C5 Ru2 73.8(2)  |
| N2 C8 1.479(5)    | C1 Ru2 N1 36.50(13)  | C8 N2 Ru2 126.0(3)   | C6 C5 Ru2 127.3(3) |
| C1 C5 1.392(5)    | N2 Ru2 N1 66.45(12)  | Ru1 N2 Ru2 85.89(12) | C5 C6 C7 101.2(3)  |
| C1 C2 1.502(5)    | C5 Ru2 Ru1 69.82(10) | N1 C1 C5 112.4(3)    | C8 C7 C6 102.6(3)  |
| C2 C3 1.530(6)    | C1 Ru2 Ru1 69.16(11) | N1 C1 C2 112.4(3)    | N2 C8 C7 106.5(3)  |
| C3 C4 1.530(6)    | N2 Ru2 Ru1 44.52(8)  | C5 C1 C2 133.8(4)    |                    |
| C5 C6 1.500(5)    | N1 Ru2 Ru1 43.40(9)  | N1 C1 Ru2 73.8(2)    |                    |

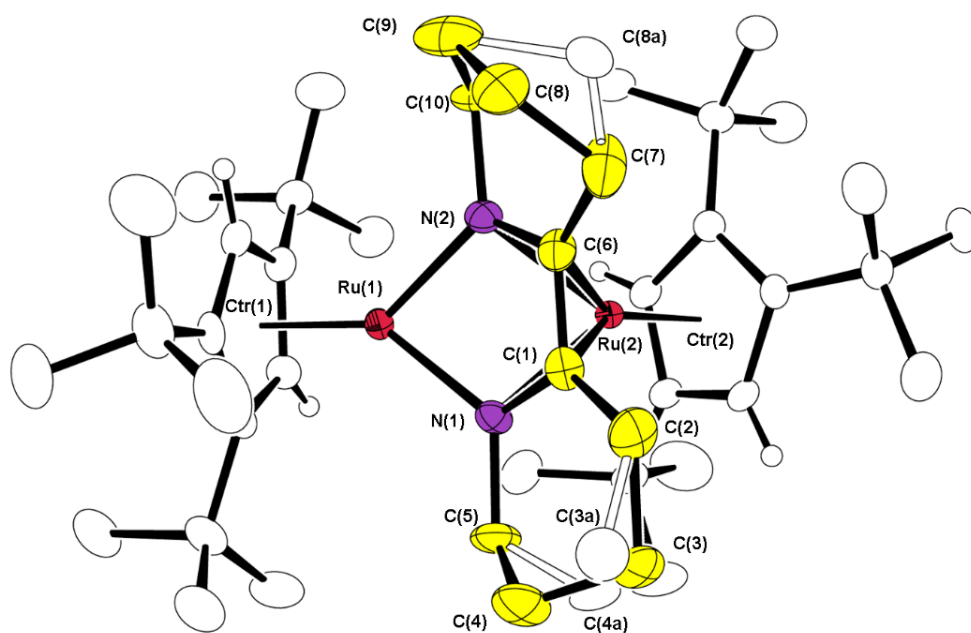

**Figure S27.** Molecular structures of **5b** with thermal ellipsoids at 30% probability. Hydrogen atoms in the tBu groups and  $\alpha$ -diimine moiety were omitted for clarity.

**Table S5.** Selected bond lengths [ $\text{\AA}$ ] and angles [ $^\circ$ ] of **5b**.

|                   |                     |                       |                      |
|-------------------|---------------------|-----------------------|----------------------|
| Ru1 N2 2.050(2)   | C7 C8A 1.267(11)    | C1 N1 C5 117.2(2)     | C4 C3 C2 108.9(6)    |
| Ru1 N1 2.070(2)   | C7 C8 1.529(6)      | C1 N1 Ru1 118.19(19)  | C5 C4 C3 109.5(6)    |
| Ru1 Ru2 2.9259(3) | C8 C8A 1.194(12)    | C5 N1 Ru1 123.41(19)  | C2 C3A C4A 107.7(10) |
| Ru2 C1 2.177(3)   | C8 C9 1.487(7)      | C1 N1 Ru2 70.24(15)   | C3A C4A C5 111.9(10) |
| Ru2 C6 2.189(3)   | C8A C9 1.806(12)    | C5 N1 Ru2 123.2(2)    | C4 C5 N1 115.4(4)    |
| Ru2 N1 2.211(2)   | C9 C10 1.523(4)     | Ru1 N1 Ru2 86.17(8)   | N1 C5 C4A 112.2(4)   |
| Ru2 N2 2.220(2)   |                     | C6 N2 C10 113.0(2)    | N2 C6 C1 112.9(3)    |
| N1 C1 1.389(4)    | N2 Ru1 N1 73.93(9)  | C6 N2 Ru1 119.22(19)  | N2 C6 C7 120.7(3)    |
| N1 C5 1.487(4)    | N2 Ru1 Ru2 49.23(6) | C10 N2 Ru1 125.64(19) | C1 C6 C7 124.7(3)    |
| N2 C6 1.374(4)    | N1 Ru1 Ru2 48.93(6) | C6 N2 Ru2 70.58(15)   | N2 C6 Ru2 73.10(16)  |
| N2 C10 1.479(3)   | C1 Ru2 C6 37.78(11) | C10 N2 Ru2 125.88(19) | C1 C6 Ru2 70.68(17)  |
| C1 C6 1.414(4)    | C1 Ru2 N1 36.90(10) | Ru1 N2 Ru2 86.41(8)   | C7 C6 Ru2 136.7(2)   |
| C1 C2 1.522(4)    | C6 Ru2 N1 63.94(10) | N1 C1 C6 112.4(3)     | C8A C7 C6 123.7(6)   |
| C2 C3A 1.400(13)  | C1 Ru2 N2 63.77(10) | N1 C1 C2 124.1(3)     | C8A C7 C8 49.5(5)    |
| C2 C3 1.574(8)    | C6 Ru2 N2 36.32(10) | C6 C1 C2 122.7(3)     | C6 C7 C8 106.4(3)    |
| C3 C4 1.533(11)   | N1 Ru2 N2 67.99(9)  | N1 C1 Ru2 72.86(16)   | C9 C8 C7 112.2(4)    |
| C4 C5 1.465(6)    | C1 Ru2 Ru1 69.94(8) | C6 C1 Ru2 71.54(17)   | C7 C8A C9 107.8(7)   |
| C3A C4A 1.503(18) | C6 Ru2 Ru1 69.38(8) | C2 C1 Ru2 131.3(2)    | C8 C9 C10 114.4(3)   |
| C4A C5 1.568(11)  | N1 Ru2 Ru1 44.90(6) | C3A C2 C1 115.4(6)    | C10 C9 C8A 95.0(4)   |
| C6 C7 1.517(4)    | N2 Ru2 Ru1 44.36(6) | C1 C2 C3 112.2(4)     | N2 C10 C9 112.6(3)   |

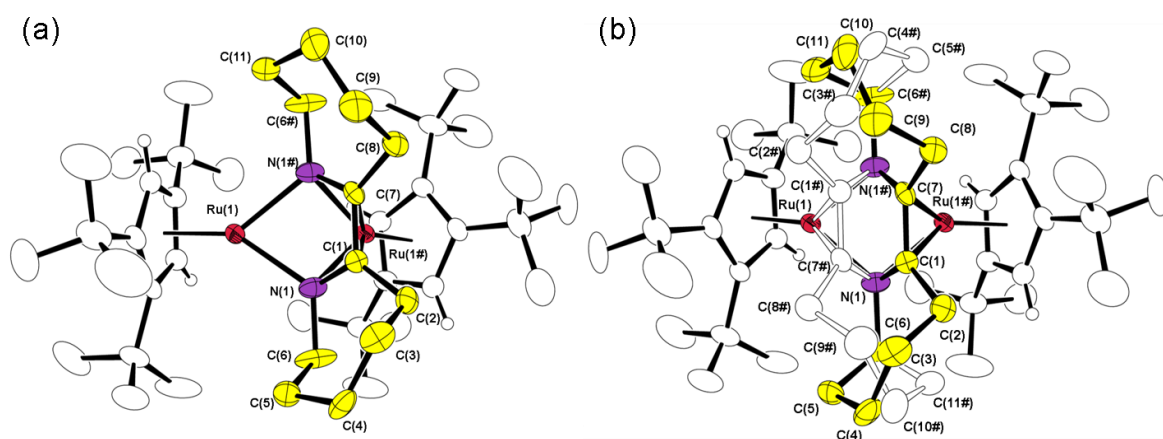

**Figure S28.** Molecular structures of **5c** with thermal ellipsoids at 30% probability. (a) Disordered atoms were omitted for clarity, (b) Disordered atoms were drawn in white lines. Hydrogen atoms in the *t*Bu groups and  $\alpha$ -diimine moiety were omitted for clarity.

**Table S6.** Selected bond lengths [ $\text{\AA}$ ] and angles [ $^\circ$ ] of **5c**.

|                    |                        |                       |                      |
|--------------------|------------------------|-----------------------|----------------------|
| Ru1 N1# 2.137(4)   | C5 C6 1.658(12)        | C1 N1 Ru1# 75.7(5)    | C5 C4 C3 114.5(15)   |
| Ru1 N1 2.137(4)    | C7 C8 1.468(12)        | C6 N1 Ru1# 122.9(4)   | C4 C5 C6 108.7(9)    |
| Ru1 Ru1# 2.9173(7) | C8 C9 1.548(17)        | C1 N1 Ru1 119.1(5)    | N1 C6 C5 111.7(5)    |
| N1 C1 1.267(10)    | C9 C10 1.50(4)         | C6 N1 Ru1 124.5(4)    | C1 C7 C8 129.1(8)    |
| N1 C6 1.496(6)     | C10 C11 1.54(3)        | Ru1 N1 Ru1# 86.11(14) | C7 C8 C9 113.2(9)    |
| C1 C7 1.421(12)    |                        | N1 C1 C7 114.5(8)     | C10 C9 C8 113.4(16)  |
| C1 C2 1.521(12)    | N1 Ru1 N1# 70.12(18)   | N1 C1 C2 123.7(8)     | C9 C10 C11 116.0(19) |
| C2 C3 1.536(18)    | N1# Ru1 Ru1# 46.95(10) | C7 C1 C2 121.8(8)     |                      |
| C3 C4 1.51(3)      | N1 Ru1 Ru1# 46.95(11)  | C1 C2 C3 113.9(9)     |                      |
| C4 C5 1.48(2)      | C1 N1 C6 113.8(5)      | C2 C3 C4 111.1(14)    |                      |

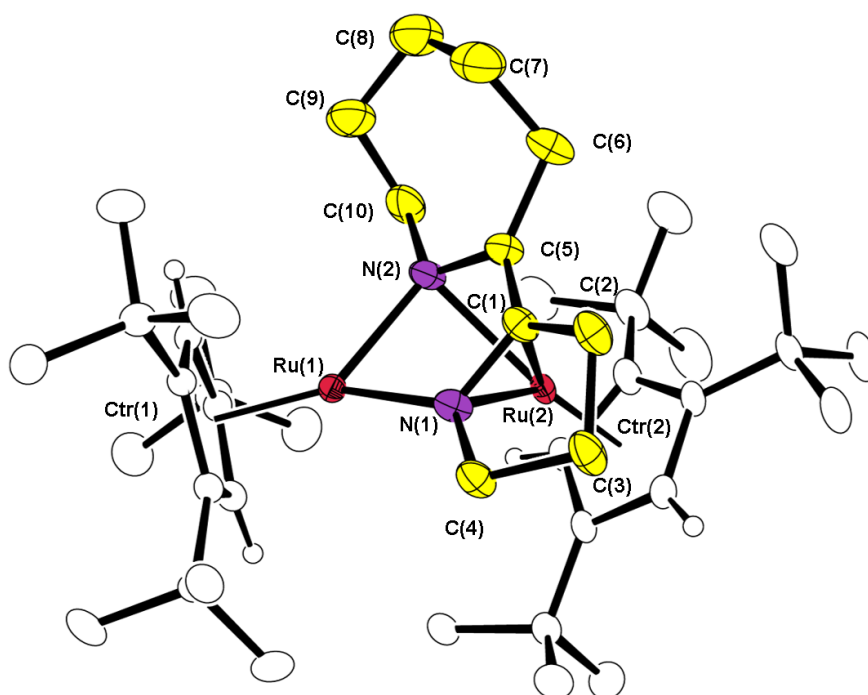

**Figure S29.** Molecular structures of **5d** with thermal ellipsoids at 30% probability. Hydrogen atoms in the <sup>t</sup>Bu groups and  $\alpha$ -diimine moiety were omitted for clarity.

**Table S7.** Selected bond lengths [ $\text{\AA}$ ] and angles [ $^\circ$ ] of **5d**.

|                   |                      |                      |                    |
|-------------------|----------------------|----------------------|--------------------|
| Ru1 N1 2.037(3)   | C7 C8 1.526(8)       | C1 N1 C4 106.4(3)    | C2 C1 Ru2 126.8(3) |
| Ru1 N2 2.059(3)   | C8 C9 1.519(7)       | C1 N1 Ru1 118.6(2)   | C1 C2 C3 101.5(3)  |
| Ru1 Ru2 2.9346(4) | C9 C10 1.483(7)      | C4 N1 Ru1 132.3(2)   | C4 C3 C2 102.1(3)  |
| Ru2 C1 2.188(4)   |                      | C1 N1 Ru2 69.7(2)    | N1 C4 C3 106.4(3)  |
| Ru2 C5 2.195(4)   | N1 Ru1 N2 73.96(12)  | C4 N1 Ru2 125.5(2)   | N2 C5 C1 111.5(3)  |
| Ru2 N2 2.218(3)   | N1 Ru1 Ru2 49.63(9)  | Ru1 N1 Ru2 86.51(11) | N2 C5 C6 122.4(3)  |
| Ru2 N1 2.240(3)   | N2 Ru1 Ru2 48.98(9)  | C5 N2 C10 115.7(3)   | C1 C5 C6 125.0(4)  |
| N1 C1 1.386(5)    | C1 Ru2 C5 37.52(14)  | C5 N2 Ru1 119.3(2)   | N2 C5 Ru2 72.8(2)  |
| N1 C4 1.483(4)    | C1 Ru2 N2 62.99(13)  | C10 N2 Ru1 123.1(3)  | C1 C5 Ru2 71.0(2)  |
| N2 C5 1.376(5)    | C5 Ru2 N2 36.32(13)  | C5 N2 Ru2 70.9(2)    | C6 C5 Ru2 133.3(3) |
| N2 C10 1.467(5)   | C1 Ru2 N1 36.46(12)  | C10 N2 Ru2 125.2(3)  | C7 C6 C5 113.8(4)  |
| C1 C5 1.409(5)    | C5 Ru2 N1 63.58(13)  | Ru1 N2 Ru2 86.56(11) | C6 C7 C8 112.7(4)  |
| C1 C2 1.503(5)    | N2 Ru2 N1 67.11(11)  | N1 C1 C5 113.4(3)    | C9 C8 C7 112.6(4)  |
| C2 C3 1.541(6)    | C1 Ru2 Ru1 68.91(10) | N1 C1 C2 112.7(3)    | C10 C9 C8 113.1(5) |
| C3 C4 1.525(5)    | C5 Ru2 Ru1 69.44(10) | C5 C1 C2 133.7(4)    | N2 C10 C9 112.7(4) |
| C5 C6 1.505(5)    | N2 Ru2 Ru1 44.46(8)  | N1 C1 Ru2 73.8(2)    |                    |
| C6 C7 1.498(7)    | N1 Ru2 Ru1 43.86(8)  | C5 C1 Ru2 71.5(2)    |                    |

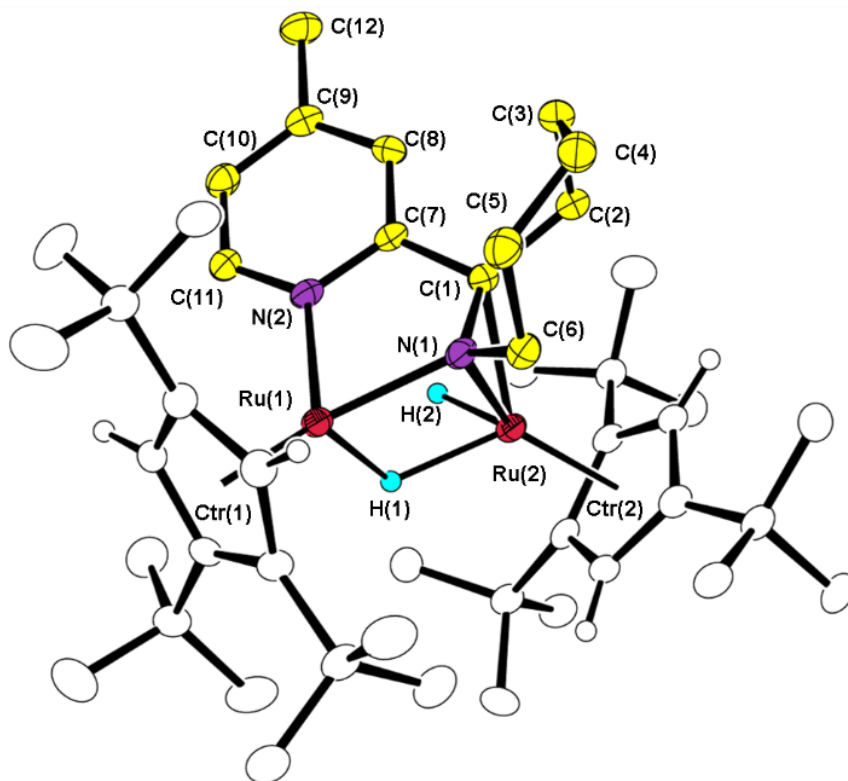

**Figure S30.** Molecular structures of **7c** with thermal ellipsoids at 30% probability. Hydrogen atoms in the 'Bu groups and  $\alpha$ -diimine moiety were omitted for clarity.

**Table S8.** Selected bond lengths [ $\text{\AA}$ ] and angles [ $^\circ$ ] of **7c**.

|                   |                     |                      |                     |
|-------------------|---------------------|----------------------|---------------------|
| Ru1 N1 2.065(3)   | C7 C8 1.388(5)      | N1 Ru2 H2 102.9(13)  | C3 C4 C5 114.6(3)   |
| Ru1 N2 2.107(3)   | C8 C9 1.386(5)      | C1 Ru2 H2 81.5(14)   | C6 C5 C4 113.6(3)   |
| Ru1 Ru2 2.9524(4) | C9 C10 1.388(5)     | Ru1 Ru2 H2 78.1(13)  | N1 C6 C5 113.0(3)   |
| Ru1 H1 1.80(3)    | C9 C12 1.508(5)     | H1 Ru2 H2 67.3(16)   | C11 N2 C7 117.6(3)  |
| Ru2 N1 2.097(3)   | C10 C11 1.373(5)    | C1 N1 C6 118.1(3)    | C11 N2 Ru1 126.0(2) |
| Ru2 C1 2.150(3)   |                     | C1 N1 Ru1 114.7(2)   | C7 N2 Ru1 116.4(2)  |
| Ru2 H1 1.77(4)    | N1 Ru1 N2 78.01(11) | C6 N1 Ru1 123.7(2)   | N2 C7 C8 121.4(3)   |
| Ru2 H2 1.52(4)    | N1 Ru1 Ru2 45.26(7) | C1 N1 Ru2 72.55(17)  | N2 C7 C1 113.9(3)   |
| N1 C1 1.415(4)    | N2 Ru1 Ru2 78.39(8) | C6 N1 Ru2 122.7(2)   | C8 C7 C1 124.7(3)   |
| N1 C6 1.483(4)    | N1 Ru1 H1 78.6(11)  | Ru1 N1 Ru2 90.36(10) | C9 C8 C7 120.8(3)   |
| C1 C7 1.487(5)    | N2 Ru1 H1 88.6(11)  | N1 C1 C7 113.1(3)    | C8 C9 C10 117.0(3)  |
| C1 C2 1.529(5)    | Ru2 Ru1 H1 33.7(11) | N1 C1 C2 119.8(3)    | C8 C9 C12 121.4(3)  |
| C2 C3 1.543(5)    | N1 Ru2 C1 38.90(11) | C7 C1 C2 116.2(3)    | C10 C9 C12 121.6(3) |
| C3 C4 1.524(5)    | N1 Ru2 Ru1 44.39(8) | N1 C1 Ru2 68.55(17)  | C11 C10 C9 120.2(3) |
| C4 C5 1.537(5)    | C1 Ru2 Ru1 68.63(9) | C7 C1 Ru2 110.8(2)   | N2 C11 C10 122.8(3) |
| C5 C6 1.526(5)    | N1 Ru2 H1 78.4(11)  | C2 C1 Ru2 119.5(2)   |                     |
| N2 C11 1.351(4)   | C1 Ru2 H1 99.5(12)  | C1 C2 C3 114.1(3)    |                     |
| N2 C7 1.360(4)    | Ru1 Ru2 H1 34.3(11) | C4 C3 C2 112.7(3)    |                     |

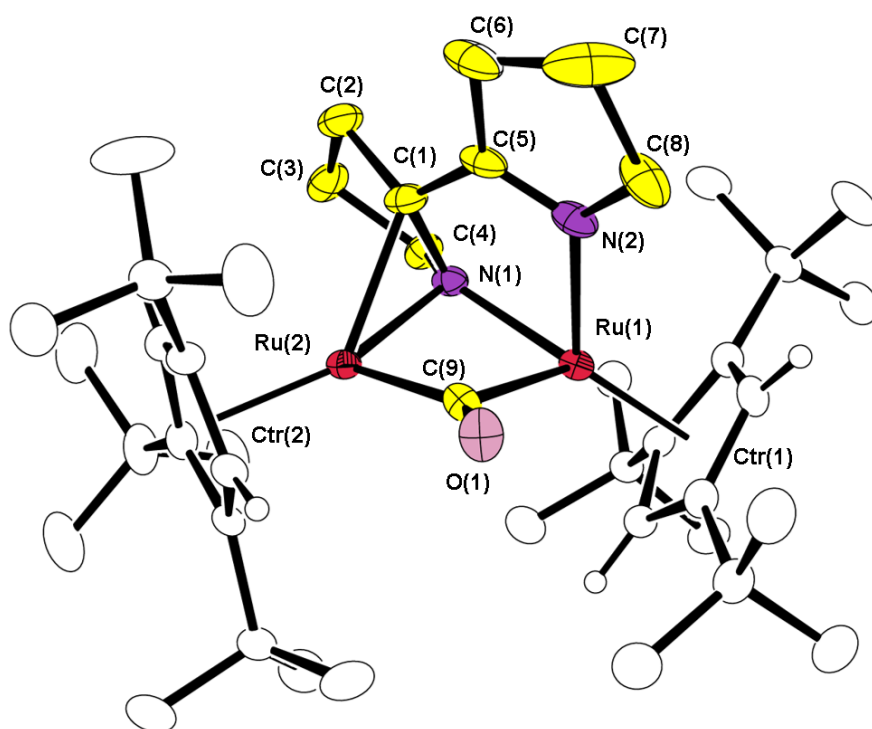

**Figure S31.** Molecular structures of **11** with thermal ellipsoids at 30% probability. Hydrogen atoms in the <sup>t</sup>Bu groups were omitted for clarity.

**Table S9.** Selected bond lengths [Å] and angles [°] of **11**.

|                   |                     |                      |                      |
|-------------------|---------------------|----------------------|----------------------|
| Ru1 N1 2.059(2)   | C3 C4 1.523(4)      | N1 Ru2 Ru1 46.28(6)  | C5 C1 Ru2 111.42(19) |
| Ru1 N2 2.082(2)   | C5 C6 1.511(4)      | C1 Ru2 Ru1 69.01(7)  | C2 C1 Ru2 120.7(2)   |
| Ru1 C9 2.173(3)   | C6 C7 1.527(6)      | C1 N1 C4 107.9(2)    | C1 C2 C3 102.9(2)    |
| Ru1 Ru2 2.8455(3) | C7 C8 1.518(5)      | C1 N1 Ru1 110.89(17) | C4 C3 C2 103.7(3)    |
| Ru2 C9 1.944(3)   |                     | C4 N1 Ru1 135.49(17) | N1 C4 C3 104.9(2)    |
| Ru2 N1 2.062(2)   | N1 Ru1 N2 78.37(9)  | C1 N1 Ru2 74.49(14)  | N2 C5 C1 117.9(2)    |
| Ru2 C1 2.173(3)   | N1 Ru1 C9 86.35(9)  | C4 N1 Ru2 123.96(18) | N2 C5 C6 113.3(3)    |
| O1 C9 1.179(3)    | N2 Ru1 C9 74.49(9)  | Ru1 N1 Ru2 87.34(8)  | C1 C5 C6 128.7(3)    |
| N1 C1 1.431(3)    | N1 Ru1 Ru2 46.38(6) | C5 N2 C8 111.6(2)    | C5 C6 C7 102.7(3)    |
| N1 C4 1.475(3)    | N2 Ru1 Ru2 84.08(7) | C5 N2 Ru1 114.45(19) | C8 C7 C6 105.8(3)    |
| N2 C5 1.286(4)    | C9 Ru1 Ru2 43.03(7) | C8 N2 Ru1 131.6(2)   | N2 C8 C7 105.4(3)    |
| N2 C8 1.468(4)    | C9 Ru2 N1 92.56(10) | N1 C1 C5 112.9(2)    | O1 C9 Ru2 143.2(2)   |
| C1 C5 1.440(4)    | C9 Ru2 C1 93.48(11) | N1 C1 C2 109.7(2)    | O1 C9 Ru1 129.5(2)   |
| C1 C2 1.520(4)    | N1 Ru2 C1 39.40(9)  | C5 C1 C2 122.2(3)    | Ru2 C9 Ru1 87.27(10) |
| C2 C3 1.530(5)    | C9 Ru2 Ru1 49.70(7) | N1 C1 Ru2 66.11(13)  |                      |



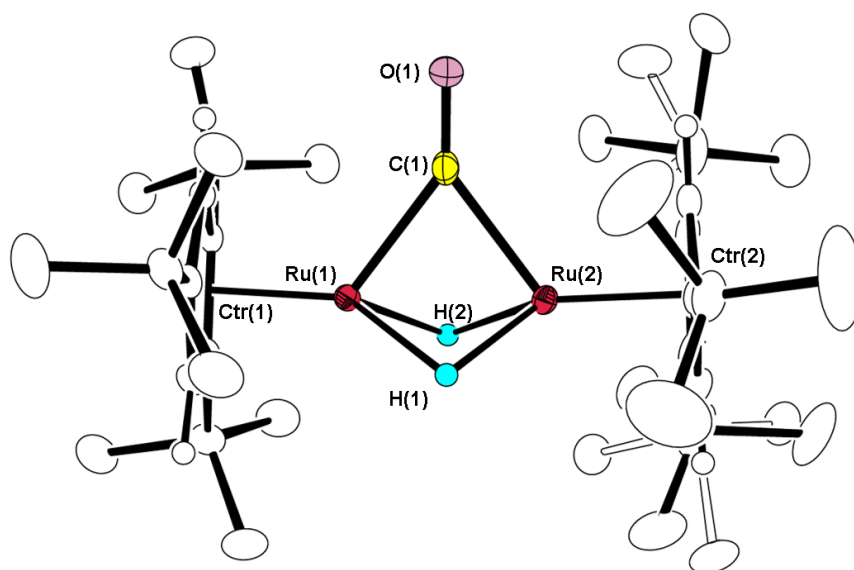

**Figure S32.** Molecular structures of **12** with thermal ellipsoids at 30% probability. Hydrogen atoms in the <sup>t</sup>Bu groups were omitted for clarity.

**Table S10.** Selected bond lengths [Å] and angles [°] of **12**.

|                     |  |                     |                      |
|---------------------|--|---------------------|----------------------|
| Ru1 C1 2.0187(19)   |  | C1 Ru1 Ru2 53.35(5) | C1 Ru2 H1 86.8(9)    |
| Ru1 Ru2 2.43300(19) |  | C1 Ru1 H1 85.3(9)   | Ru1 Ru2 H1 46.9(9)   |
| Ru1 H1 1.78(3)      |  | Ru2 Ru1 H1 44.4(9)  | C1 Ru2 H2 82.1(8)    |
| Ru1 H2 1.71(2)      |  | C1 Ru1 H2 83.2(8)   | Ru1 Ru2 H2 44.7(8)   |
| Ru2 C1 2.0325(18)   |  | Ru2 Ru1 H2 45.6(8)  | H1 Ru2 H2 72.3(12)   |
| Ru2 H1 1.70(3)      |  | H1 Ru1 H2 71.1(12)  | O1 C1 Ru1 143.50(15) |
| Ru2 H2 1.74(2)      |  | C1 Ru2 Ru1 52.83(5) | O1 C1 Ru2 142.66(15) |
| O1 C1 1.173(2)      |  |                     | Ru1 C1 Ru2 73.82(6)  |

**Table S11.** Comparison of selected metrical parameters of **11** with those of  $[\{\text{Cp}^*\text{Ru}(\mu\text{-H})\}_2(\text{CO})]^\#$ .

|             | <b>11</b>   | $[\{\text{Cp}^*\text{Ru}(\mu\text{-H})\}_2(\text{CO})]^\#$ |                  | <b>11</b>  | $[\{\text{Cp}^*\text{Ru}(\mu\text{-H})\}_2(\text{CO})]^\#$ |
|-------------|-------------|------------------------------------------------------------|------------------|------------|------------------------------------------------------------|
| Ru(1)–Ru(2) | 2.43300(19) | 2.444(1)                                                   | Ru(1)–C(1)–Ru(2) | 73.82(6)   | 74.1(2)                                                    |
| Ru(1)–C(1)  | 2.0187(19)  | 2.004(6)                                                   | Ru(1)–C(1)–O(1)  | 143.50(15) | 147.1(5)                                                   |
| Ru(2)–C(1)  | 2.0325(18)  | 2.052(6)                                                   | Ru(2)–C(1)–O(1)  | 142.66(15) | 138.7(5)                                                   |
| C(1)–O(1)   | 1.173(2)    | 1.183(8)                                                   |                  |            |                                                            |

<sup>#</sup>Kang, B.-S.; Koellw, U.; Thewalt, U. *Organometallics* **1991**, *10*, 2560-2573.

### 3. Results of DFT calculations

(a)  $[\{\text{Cp}^*\text{Ru}(\mu\text{-H})\}_2(\mu\text{-}\eta^2\text{-C}_4\text{H}_7\text{N})]$  (**2a**) and  $[\{\text{CpRu}(\mu\text{-H})\}_2(\mu\text{-}\eta^2\text{-C}_4\text{H}_7\text{N})]$  (**2a-m**)

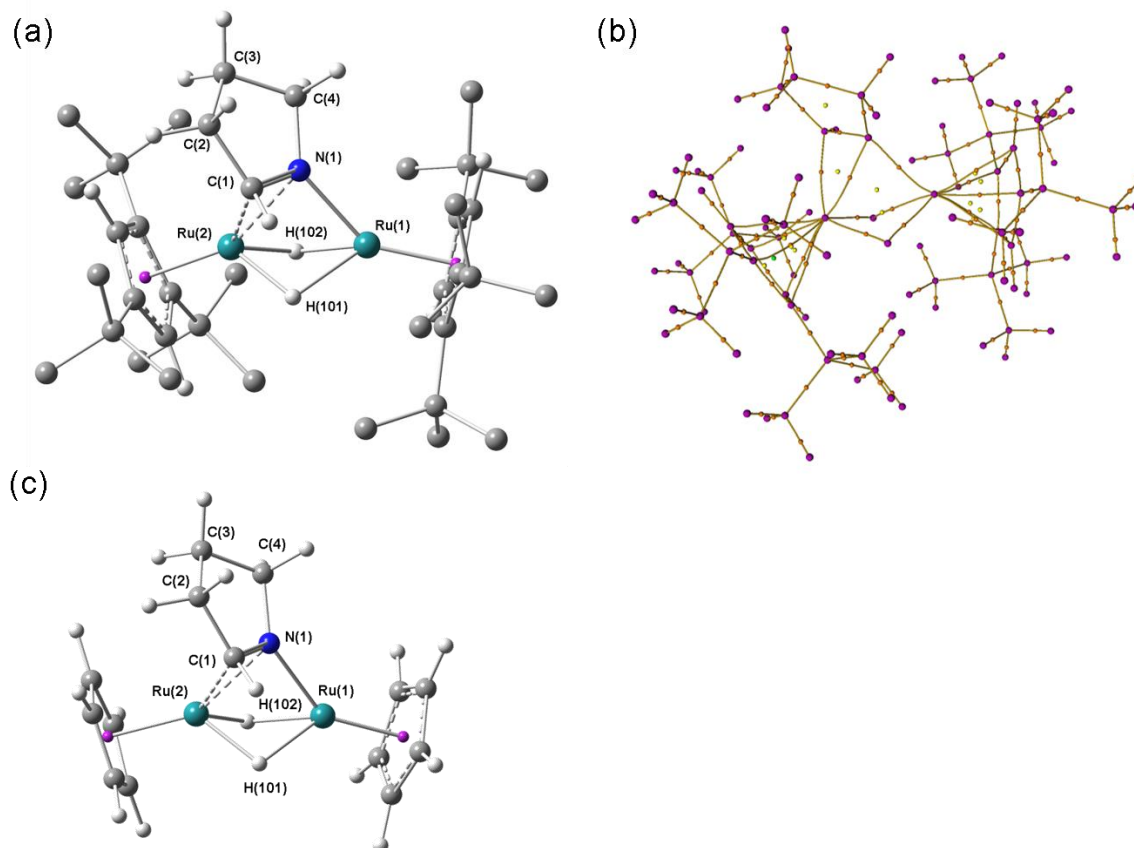

**Figure S33.** (a) Optimized structure of  $[\{\text{Cp}^*\text{Ru}(\mu\text{-H})\}_2(\mu\text{-}\eta^2\text{-C}_4\text{H}_7\text{N})]$  (**2a**) by DFT calculations ( $\omega\text{B97X-D}$  / SDD (Ru), 6-31G(d,p) (C, H, and N)). Hydrogen atoms in the 'Bu groups were omitted for clarity. (b) Bond paths (orange lines) and bond critical points (small orange circles), ring critical points (small yellow circles), and cage critical points (small green circles) in **2a**. (c) Optimized structure of  $[\{\text{CpRu}(\mu\text{-H})\}_2(\mu\text{-}\eta^2\text{-C}_4\text{H}_7\text{N})]$  (**2a-m**) by DFT calculations (B3LYP / SDD (Ru), 6-31G(d,p) (C, H, and N)).

**Table S12.** Selected bond lengths [ $\text{\AA}$ ] and angles [ $^\circ$ ] of the optimized structure of **2a** and **2a-m**. The observed data of **2a** were listed for comparison.

| Lengths      | obsd.      | 2a     | 2a-m   | Angles           | obsd.      | 2a      | 2a-m    |
|--------------|------------|--------|--------|------------------|------------|---------|---------|
| Ru(1)–Ru(2)  | 2.6290(3)  | 2.6277 | 2.6453 | Ru(2)–Ru(1)–N(1) | 52.48(5)   | 52.265  | 52.445  |
| Ru(1)–H(101) | 1.81(2)    | 1.8784 | 1.8900 | Ru(1)–Ru(2)–N(1) | 49.81(5)   | 50.634  | 50.620  |
| Ru(1)–H(102) | 1.69(3)    | 1.8261 | 1.7993 | Ru(1)–Ru(2)–C(1) | 77.79(6)   | 77.950  | 77.837  |
| Ru(2)–H(101) | 1.68(2)    | 1.7053 | 1.7217 | Ru(1)–N(1)–Ru(2) | 77.71(6)   | 77.102  | 76.934  |
| Ru(2)–H(102) | 1.68(3)    | 1.7171 | 1.7411 | Ru(1)–N(1)–C(1)  | 121.47(14) | 119.962 | 120.644 |
| Ru(1)–N(1)   | 2.0554(17) | 2.0840 | 2.0991 | Ru(1)–N(1)–C(4)  | 128.82(14) | 129.566 | 129.334 |
| Ru(2)–N(1)   | 2.1342(17) | 2.1319 | 2.1529 | C(1)–N(1)–C(4)   | 109.52(17) | 110.358 | 110.011 |
| Ru(2)–C(1)   | 2.145(2)   | 2.1390 | 2.1676 | N(1)–C(1)–C(2)   | 109.92(18) | 109.653 | 109.985 |
| C(1)–N(1)    | 1.387(3)   | 1.3826 | 1.3834 |                  |            |         |         |

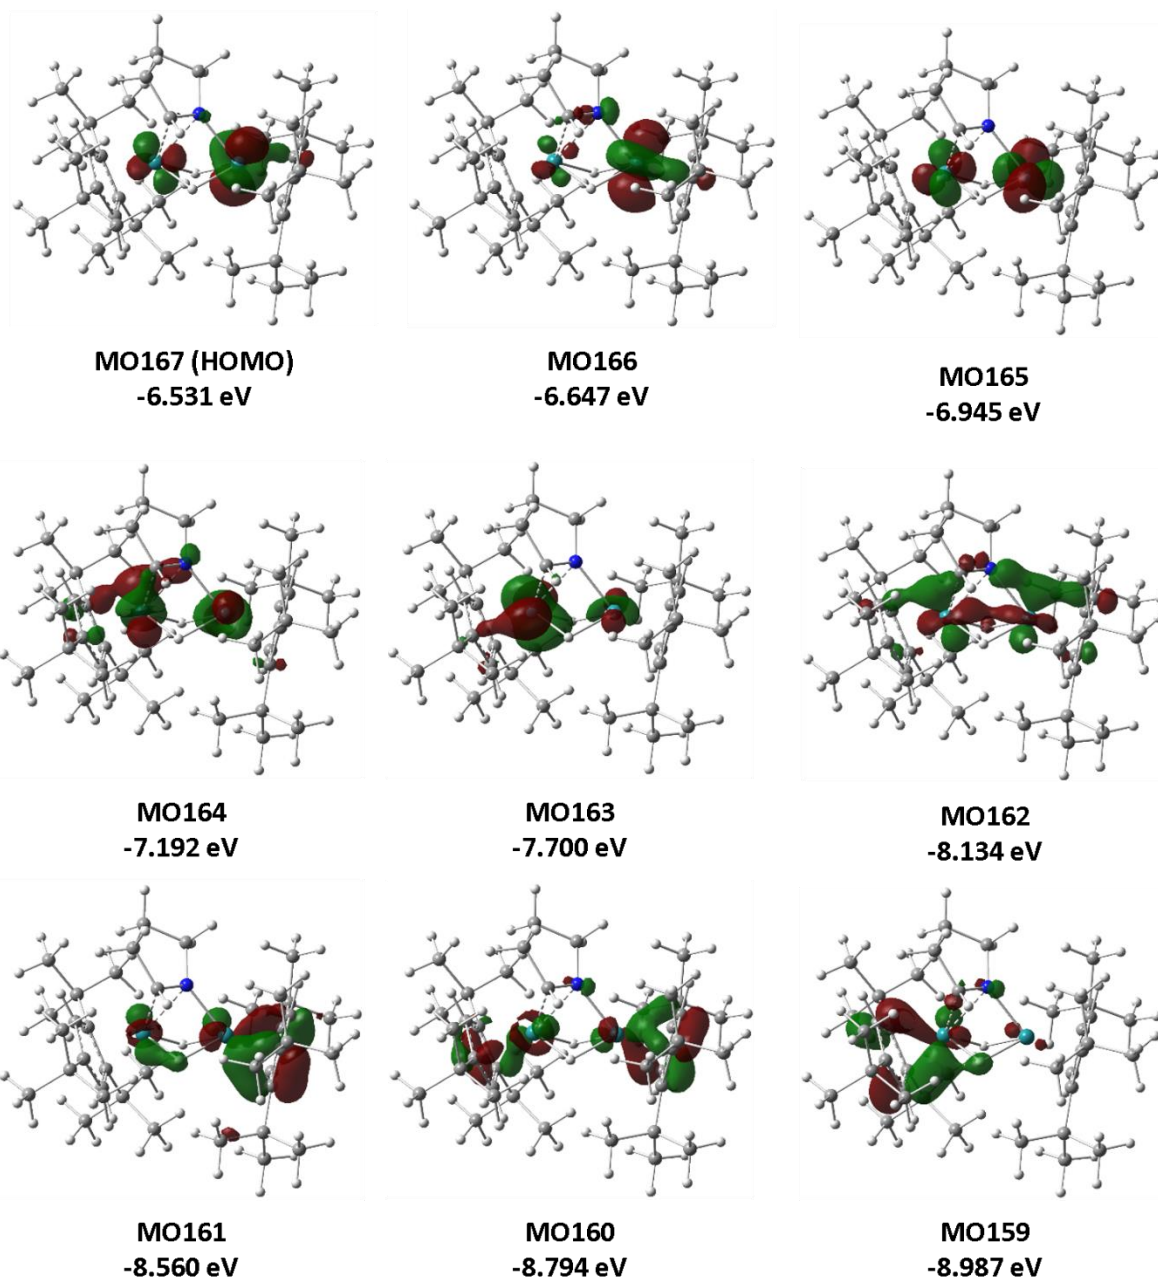

**Figure S34.** Shapes of selected molecular orbitals of **2a** with their Eigenvalues (eV) ( $\omega$ B97X-D / SDD (Ru), 6-31G(d,p) (C, H, and N)), isovalue 0.06).

(b)  $[(\text{Cp}^\ddagger\text{Ru})_2(\mu\text{-}\eta^1\text{:}\eta^1\text{-C}_8\text{H}_{12}\text{N}_2)]$  (**5a**) and  $[(\text{CpRu})_2(\mu\text{-}\eta^1\text{:}\eta^1\text{-C}_8\text{H}_{12}\text{N}_2)]$  (**5a-m**)

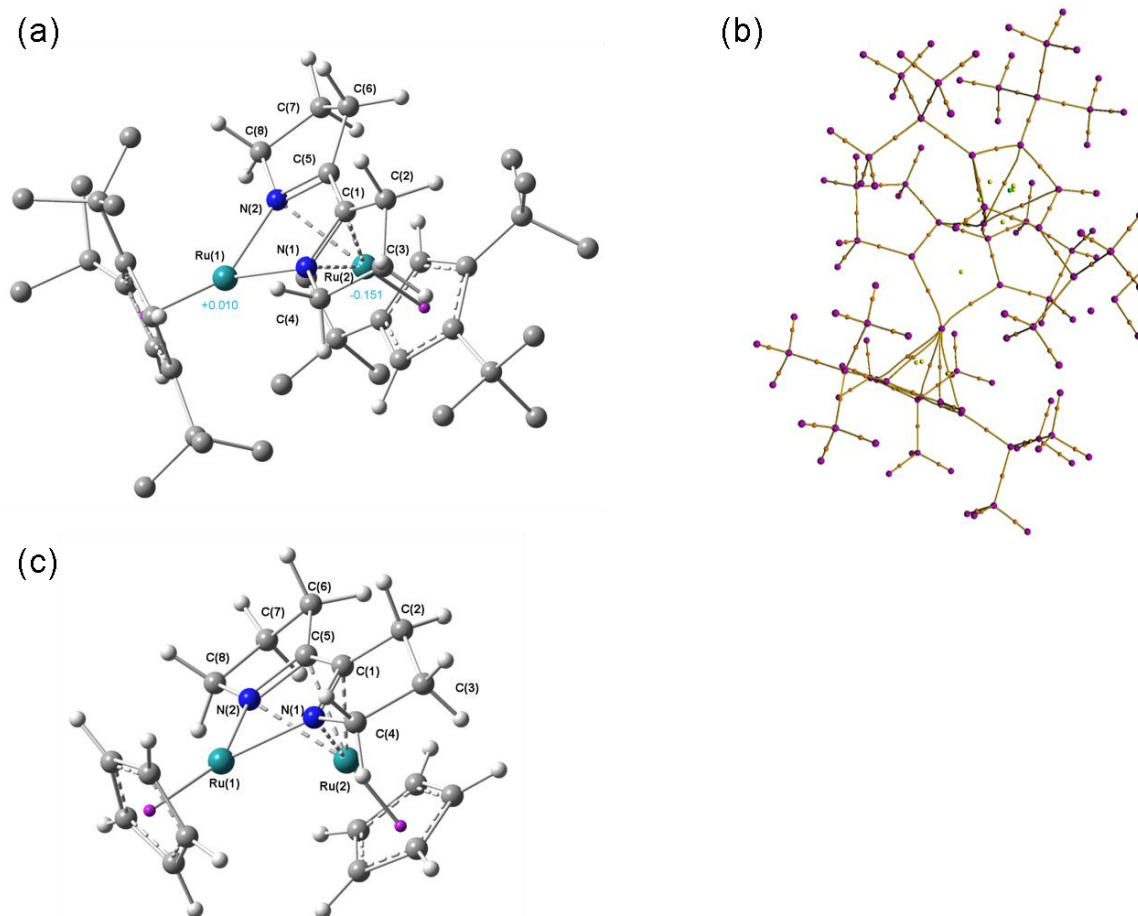

**Figure S35.** (a) Optimized structure of  $[(\text{Cp}^\ddagger\text{Ru})_2(\mu\text{-}\eta^1\text{:}\eta^1\text{-C}_8\text{H}_{12}\text{N}_2)]$  (**5a**) by DFT calculations ( $\omega\text{B97X-D}$  / SDD (Ru), 6-31G(d,p) (C, H, and N)). Hydrogen atoms in the 'Bu groups were omitted for clarity. The NBO charges at the Ru atoms were shown in a blue letter. (b) Bond paths (orange lines) and bond critical points (small orange circles), ring critical points (small yellow circles), and cage critical points (small green circles) in **5a**. (c) Optimized structure of  $[(\text{CpRu})_2(\mu\text{-}\eta^1\text{:}\eta^1\text{-C}_8\text{H}_{12}\text{N}_2)]$  (**5a-m**) by DFT calculations (B3LYP / SDD (Ru), 6-31G(d,p) (C, H, and N)).

**Table S13.** Selected bond lengths [ $\text{\AA}$ ] and angles [ $^\circ$ ] of the optimized structure of **5a** and **5a-m**. The observed data of **5a** were listed for comparison.

| Lengths     | obsd.     | <b>5a</b> | <b>5a-m</b> | Angles           | obsd.     | <b>5a</b> | <b>5a-m</b> |
|-------------|-----------|-----------|-------------|------------------|-----------|-----------|-------------|
| Ru(1)–Ru(2) | 2.9274(4) | 2.9498    | 2.8281      | Ru(2)–Ru(1)–N(1) | 49.81(9)  | 50.013    | 51.469      |
| Ru(1)–N(1)  | 2.015(3)  | 2.0390    | 2.0649      | Ru(2)–Ru(1)–N(2) | 49.59(9)  | 49.410    | 51.4536     |
| Ru(1)–N(2)  | 2.058(3)  | 2.0700    | 2.0648      | N(1)–Ru(1)–N(2)  | 74.03(13) | 73.756    | 74.286      |
| Ru(2)–N(1)  | 2.240(3)  | 2.2647    | 2.2330      | Ru(1)–Ru(2)–N(1) | 43.40(9)  | 43.618    | 46.333      |
| Ru(2)–N(2)  | 2.235(3)  | 2.2451    | 2.2324      | Ru(1)–Ru(2)–N(2) | 44.52(8)  | 44.439    | 46.332      |
| Ru(2)–C(1)  | 2.189(4)  | 2.1782    | 2.1797      | N(1)–Ru(2)–N(2)  | 66.45(12) | 66.296    | 67.890      |
| Ru(2)–C(5)  | 2.178(4)  | 2.1572    | 2.1794      | Ru(1)–N(1)–C(1)  | 120.2(3)  | 120.490   | 119.586     |
| N(1)–C(1)   | 1.387(5)  | 1.3889    | 1.3971      | N(1)–C(1)–C(5)   | 112.4(3)  | 112.303   | 112.837     |
| N(2)–C(5)   | 1.395(5)  | 1.3951    | 1.3971      | C(1)–C(5)–N(2)   | 112.4(3)  | 112.671   | 112.830     |
| C(1)–C(5)   | 1.392(5)  | 1.4012    | 1.4092      | Ru(1)–N(2)–C(5)  | 118.5(2)  | 118.943   | 119.593     |

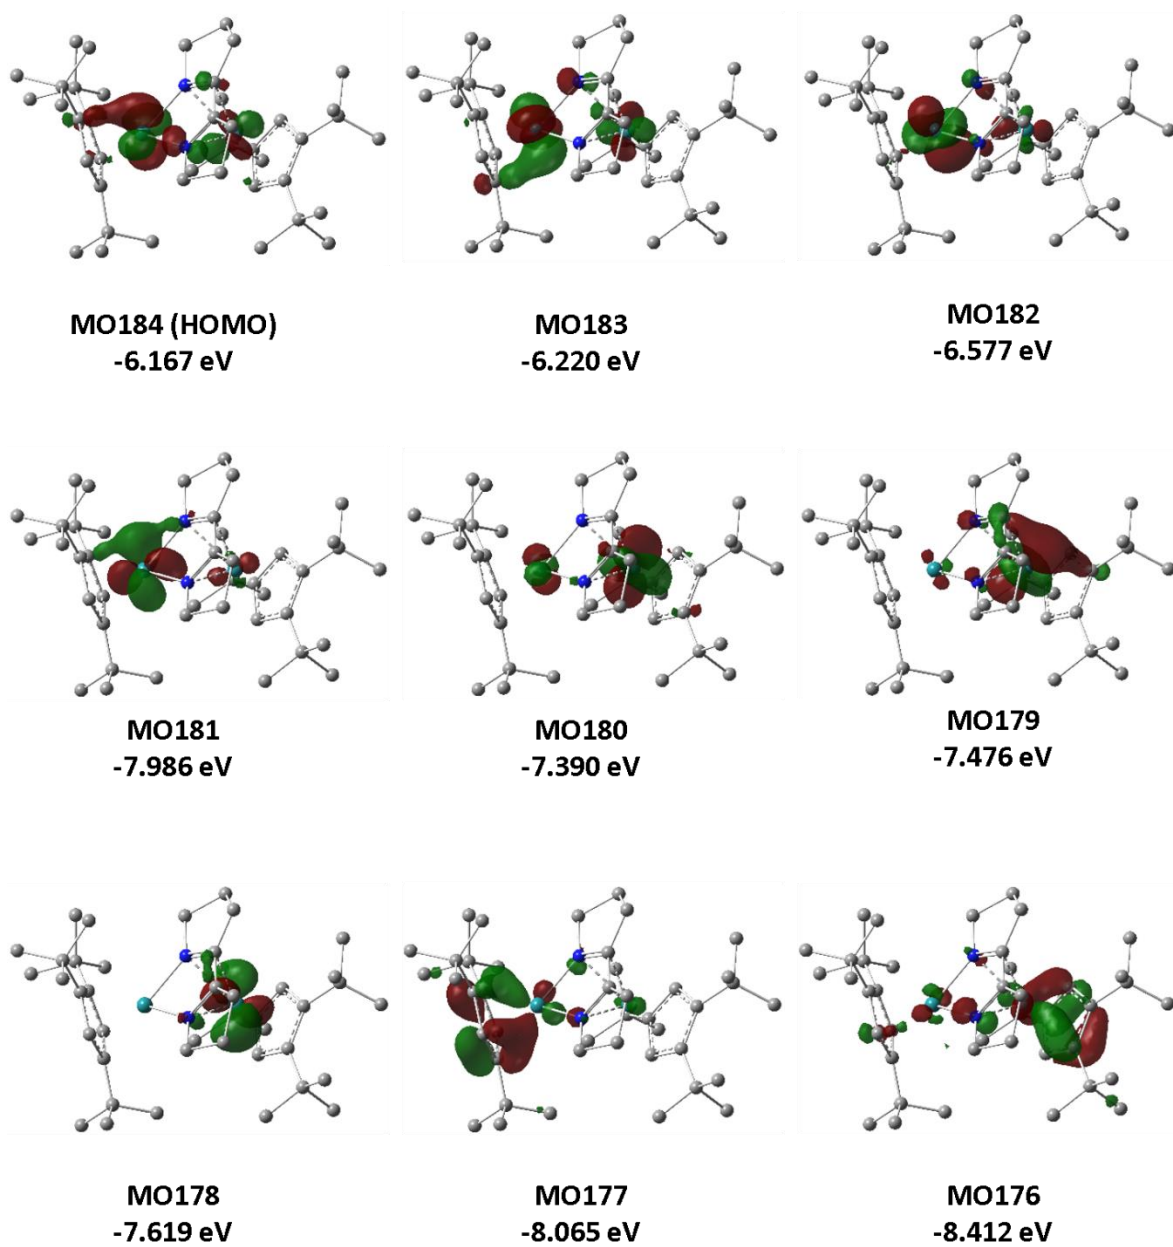

**Figure S36.** Shapes of selected molecular orbitals of **5a** with their Eigenvalues (eV) ( $\omega$ B97X-D / SDD (Ru), 6-31G(d,p) (C, H, and N)), isovalue 0.06).

(c)  $[(\text{Cp}^{\ddagger}\text{Ru})_2(\text{H})(\mu\text{-H})]_2(\mu\text{-}\eta^1:\eta^2\text{-4-Me-C}_5\text{H}_3\text{N-C}_6\text{H}_{10}\text{N})$  (**7c**)

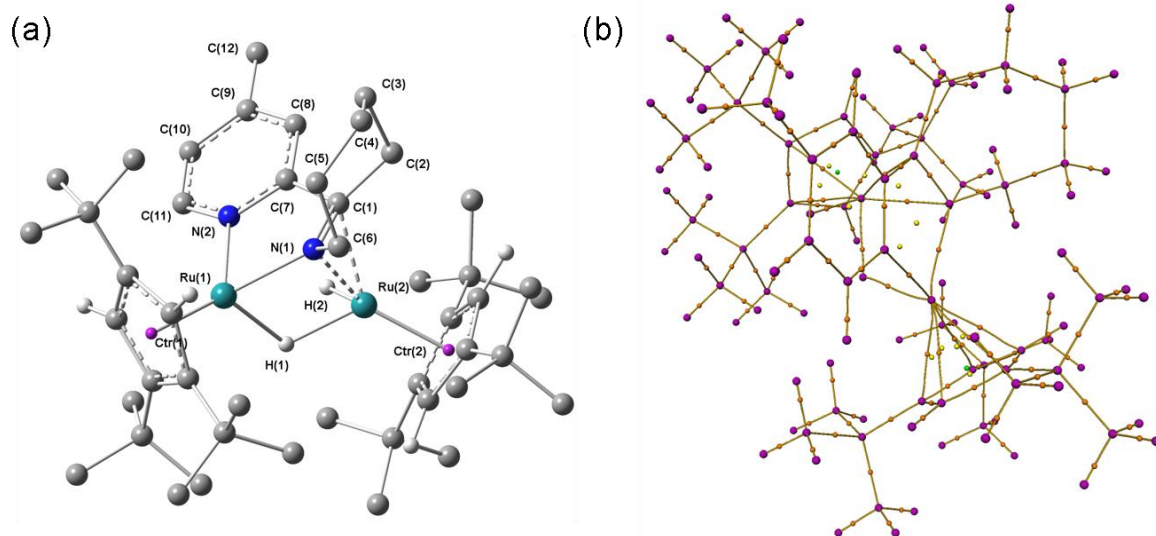

**Figure S37.** (a)  $[(\text{Cp}^{\ddagger}\text{Ru})_2(\text{H})(\mu\text{-H})(\mu\text{-}\eta^1:\eta^2\text{-4-Me-C}_5\text{H}_3\text{N-C}_6\text{H}_{10}\text{N})]$  (**7c**) by DFT calculations ( $\omega\text{B97X-D / SDD (Ru), 6-311++G(2d,p) (N(1), N(2), C(1), C(7), H(1), \text{ and } H(2)), 6-31G(d,p) (other C, H)}$ ). Hydrogen atoms in the 'Bu and diimine moieties were omitted for clarity. (b) Bond paths (orange lines) and bond critical points (small orange circles), ring critical points (small yellow circles), and cage critical points (small green circles) in **7c**.

**Table S14.** Selected bond lengths [ $\text{\AA}$ ] and angles [ $^\circ$ ] of the optimized structure of **7c**. The observed data of **7c** were listed for comparison.

| Lengths     | obsd.     | Opt.   | Angles           | obsd.     | Opt.    |
|-------------|-----------|--------|------------------|-----------|---------|
| Ru(1)–Ru(2) | 2.9524(4) | 2.9399 | Ru(2)–Ru(1)–N(1) | 45.26(7)  | 45.030  |
| Ru(1)–N(1)  | 2.065(3)  | 2.0660 | Ru(2)–Ru(1)–N(2) | 78.39(8)  | 77.560  |
| Ru(1)–N(2)  | 2.107(3)  | 2.1168 | N(1)–Ru(1)–N(2)  | 78.01(11) | 78.064  |
| Ru(1)–H(1)  | 1.80(3)   | 1.8530 | Ru(1)–Ru(2)–N(1) | 44.39(8)  | 44.647  |
| Ru(2)–N(1)  | 2.097(3)  | 2.0799 | Ru(1)–Ru(2)–C(1) | 68.63(9)  | 68.764  |
| Ru(2)–C(1)  | 2.150(3)  | 2.1338 | Ru(1)–N(1)–Ru(2) | 90.36(10) | 90.323  |
| Ru(2)–H(1)  | 1.77(4)   | 1.7227 | Ru(1)–N(1)–C(1)  | 114.7(2)  | 114.777 |
| Ru(2)–H(2)  | 1.52(4)   | 1.5622 | N(1)–C(1)–C(7)   | 113.1(3)  | 113.696 |
| N(1)–C(1)   | 1.415(4)  | 1.3998 | C(1)–C(7)–N(2)   | 113.9(3)  | 115.343 |
| N(2)–C(7)   | 1.360(4)  | 1.3477 | Ru(1)–N(2)–C(7)  | 116.4(2)  | 115.230 |
| C(1)–C(7)   | 1.487(5)  | 1.4730 |                  |           |         |

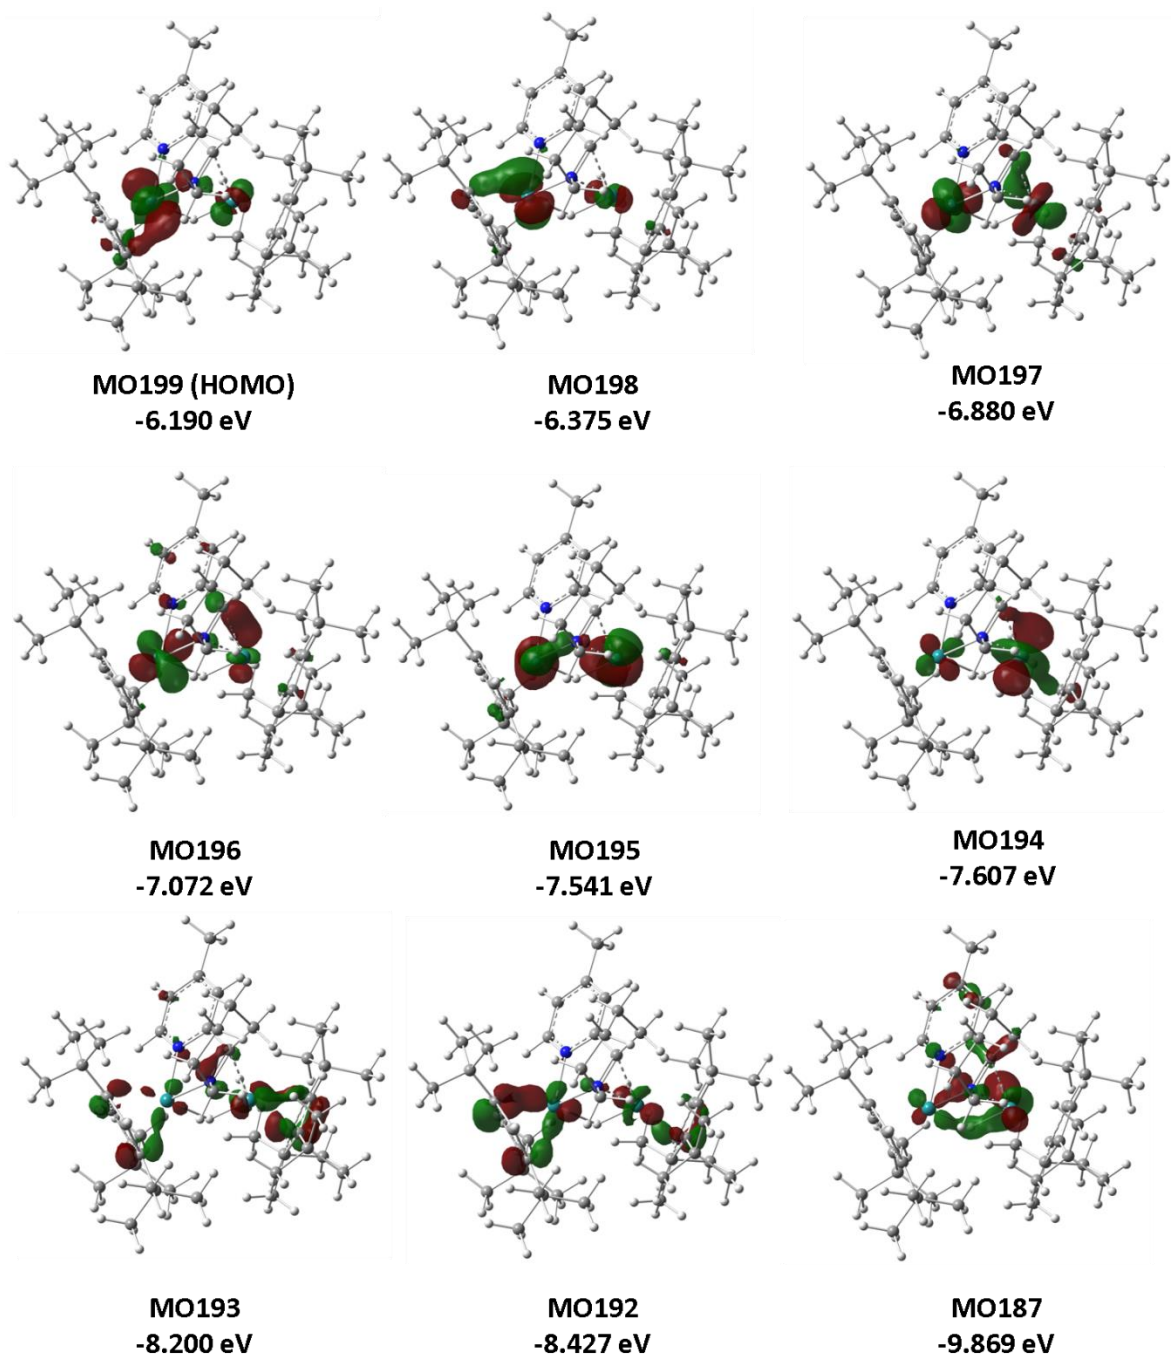

**Figure S38.** Shapes of selected molecular orbitals of **7c** with their Eigenvalues (eV) ( $\omega$ B97X-D / SDD (Ru), 6-311++G(2d,p) (N(1), N(2), C(1), C(7), H(1), and H(2)), 6-31G(d,p) (other C, H), isovalue 0.06).

(d)  $[(\text{Cp}^*\text{Ru})_2(\mu\text{-}\eta^1\text{:}\eta^1\text{:}\eta^2\text{-C}_8\text{H}_{12}\text{N}_2)(\mu\text{-H})(\text{H})]$  (**7a**)

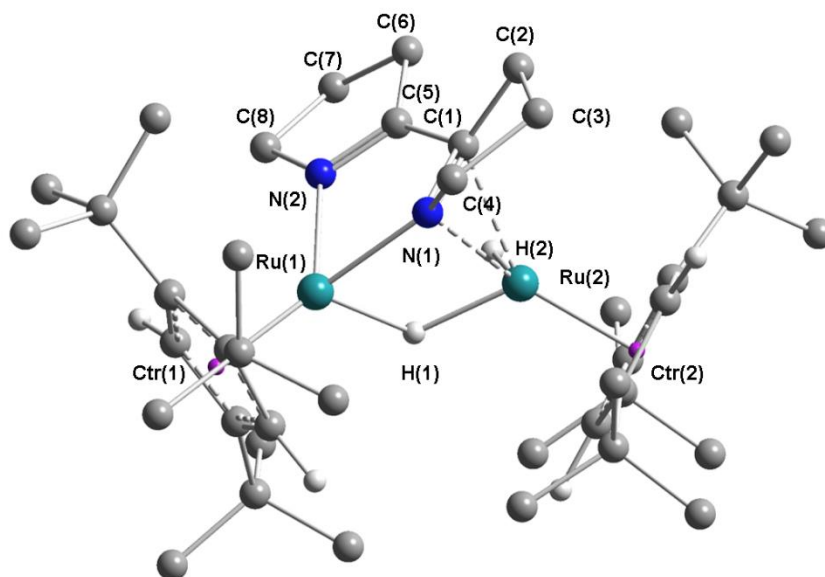

**Figure S39.** Optimized structure of  $[(\text{Cp}^*\text{Ru})_2(\mu\text{-}\eta^1\text{:}\eta^1\text{:}\eta^2\text{-C}_8\text{H}_{12}\text{N}_2)(\mu\text{-H})(\text{H})]$  (**7a**) by DFT calculations ( $\omega$ B97X-D / SDD (Ru), 6-31G(d,p) (C, H, and N)). Hydrogen atoms on the <sup>t</sup>Bu groups and diimine moiety were omitted for clarity.

**Table S15.** Selected bond lengths [Å] and angles [°] of the optimized structure of **7a**. The observed data of **7c** were listed for comparison.

| Lengths                                                                             | <b>7a</b> | Angles                    | <b>7a</b>    |
|-------------------------------------------------------------------------------------|-----------|---------------------------|--------------|
| Ru(1)–Ru(2)                                                                         | 2.9447    | Ru(2)–Ru(1)–N(1)          | 45.707       |
| Ru(1)–N(1)                                                                          | 2.0763    | Ru(2)–Ru(1)–N(2)          | 79.382       |
| Ru(1)–N(2)                                                                          | 2.1131    | N(1)–Ru(1)–N(2)           | 77.046       |
| Ru(1)–H(1)                                                                          | 1.8313    | Ru(1)–Ru(2)–N(1)          | 44.836       |
| Ru(2)–N(1)                                                                          | 2.1078    | Ru(1)–Ru(2)–C(1)          | 68.452       |
| Ru(2)–C(1)                                                                          | 2.1387    | Ru(1)–N(1)–Ru(2)          | 89.457       |
| Ru(2)–H(1)                                                                          | 1.7194    | Ru(1)–N(1)–C(1)           | 113.295      |
| Ru(2)–H(2)                                                                          | 1.5747    | N(1)–C(1)–C(5)            | 112.930      |
| N(1)–C(1)                                                                           | 1.4110    | C(1)–C(5)–N(2)            | 117.580      |
| N(2)–C(5)                                                                           | 1.2910    | Ru(1)–N(2)–C(5)           | 115.158      |
| C(1)–C(5)                                                                           | 1.4515    |                           |              |
|                                                                                     |           | <b>5a + H<sub>2</sub></b> | <b>7a</b>    |
| Sum of electronic and zero-point Energies (Hartree)                                 |           | –1941.836965              | –1941.843161 |
| Sum of electronic and thermal Energies (Hartree)                                    |           | –1941.783122              | –1941.791132 |
| Sum of electronic and thermal Enthalpies (Hartree)                                  |           | –1941.781233              | –1941.790188 |
| Sum of electronic and thermal Free Energies (Hartree)                               |           | –1941.924596              | –1941.920112 |
| Relative energy to <b>5a</b> + H <sub>2</sub> at 298.15 K (kcal mol <sup>–1</sup> ) |           | 0.00                      | +2.82        |
| Relative energy to <b>5a</b> + H <sub>2</sub> at 353 K (kcal mol <sup>–1</sup> )    |           | 0.00                      | +4.27        |



(e)  $[(\text{Cp}^{\ddagger}\text{Ru})_2(\mu\text{-}\eta^1\text{:}\eta^1\text{:}\eta^2\text{-C}_8\text{H}_{12}\text{N}_2)(\mu\text{-CO})]$  (**11**)

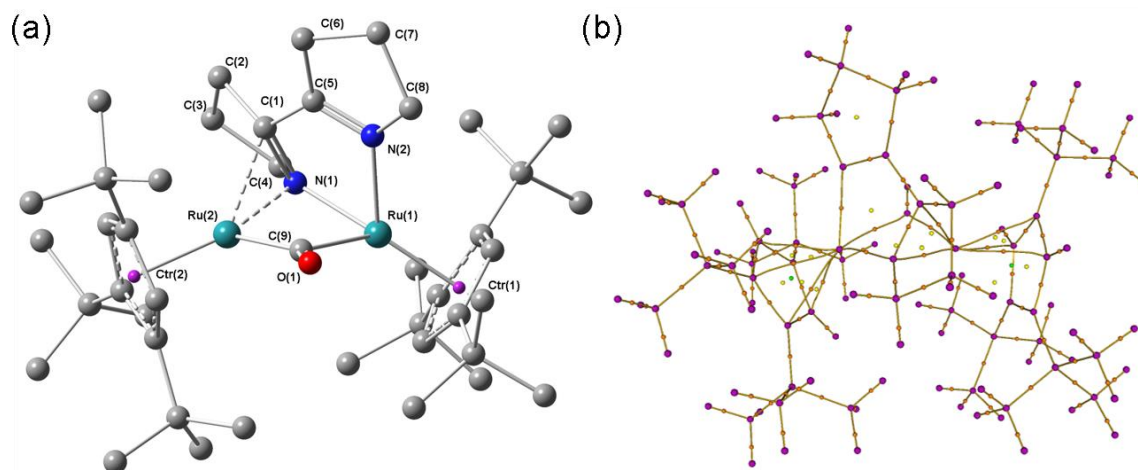

**Figure S40.** (a) Optimized structure of  $[(\text{Cp}^{\ddagger}\text{Ru})_2(\mu\text{-}\eta^1\text{:}\eta^1\text{:}\eta^2\text{-C}_8\text{H}_{12}\text{N}_2)(\mu\text{-CO})]$  (**11**) by DFT calculations ( $\omega$ B97X-D / SDD (Ru), 6-311++G(2d,p) (N(1), N(2), C(1), C(5), C(9), and O(1)), 6-31G(d,p) (other C, H)). Hydrogen atoms were omitted for clarity. (b) Bond paths (orange lines) and bond critical points (small orange circles), ring critical points (small yellow circles), and cage critical points (small green circles) in **11**.

**Table S16.** Selected bond lengths [ $\text{\AA}$ ] and angles [ $^\circ$ ] of the optimized structure of **11**. The observed data of **11** were listed for comparison.

| Lengths     | obsd.     | Opt.   | Angles           | obsd.      | Opt.    |
|-------------|-----------|--------|------------------|------------|---------|
| Ru(1)–Ru(2) | 2.8455(3) | 2.8173 | Ru(2)–Ru(1)–N(1) | 46.38(6)   | 46.252  |
| Ru(1)–N(1)  | 2.059(2)  | 2.0686 | Ru(2)–Ru(1)–N(2) | 84.08(7)   | 84.754  |
| Ru(1)–N(2)  | 2.082(2)  | 2.0869 | Ru(2)–Ru(1)–C(9) | 43.03(7)   | 43.349  |
| Ru(1)–C(9)  | 2.173(3)  | 2.1667 | N(1)–Ru(1)–N(2)  | 78.37(9)   | 78.088  |
| Ru(2)–N(1)  | 2.062(2)  | 2.0388 | Ru(1)–Ru(2)–N(1) | 46.28(6)   | 47.133  |
| Ru(2)–C(1)  | 2.173(3)  | 2.1514 | Ru(1)–Ru(2)–C(1) | 69.01(7)   | 69.620  |
| Ru(2)–C(9)  | 1.944(3)  | 1.9375 | Ru(1)–Ru(2)–C(9) | 49.70(7)   | 50.141  |
| N(1)–C(1)   | 1.431(3)  | 1.4243 | Ru(1)–N(1)–Ru(2) | 87.34(8)   | 86.614  |
| N(2)–C(5)   | 1.286(4)  | 1.2907 | Ru(1)–N(1)–C(1)  | 110.89(17) | 110.223 |
| C(1)–C(5)   | 1.440(4)  | 1.4343 | N(1)–C(1)–C(5)   | 112.9(2)   | 113.601 |
| C(9)–O(1)   | 1.179(3)  | 1.1773 | C(1)–C(5)–N(2)   | 117.9(2)   | 117.558 |
|             |           |        | Ru(1)–N(2)–C(5)  | 114.45(19) | 114.188 |
|             |           |        | Ru(1)–C(9)–Ru(2) | 87.27(10)  | 86.510  |

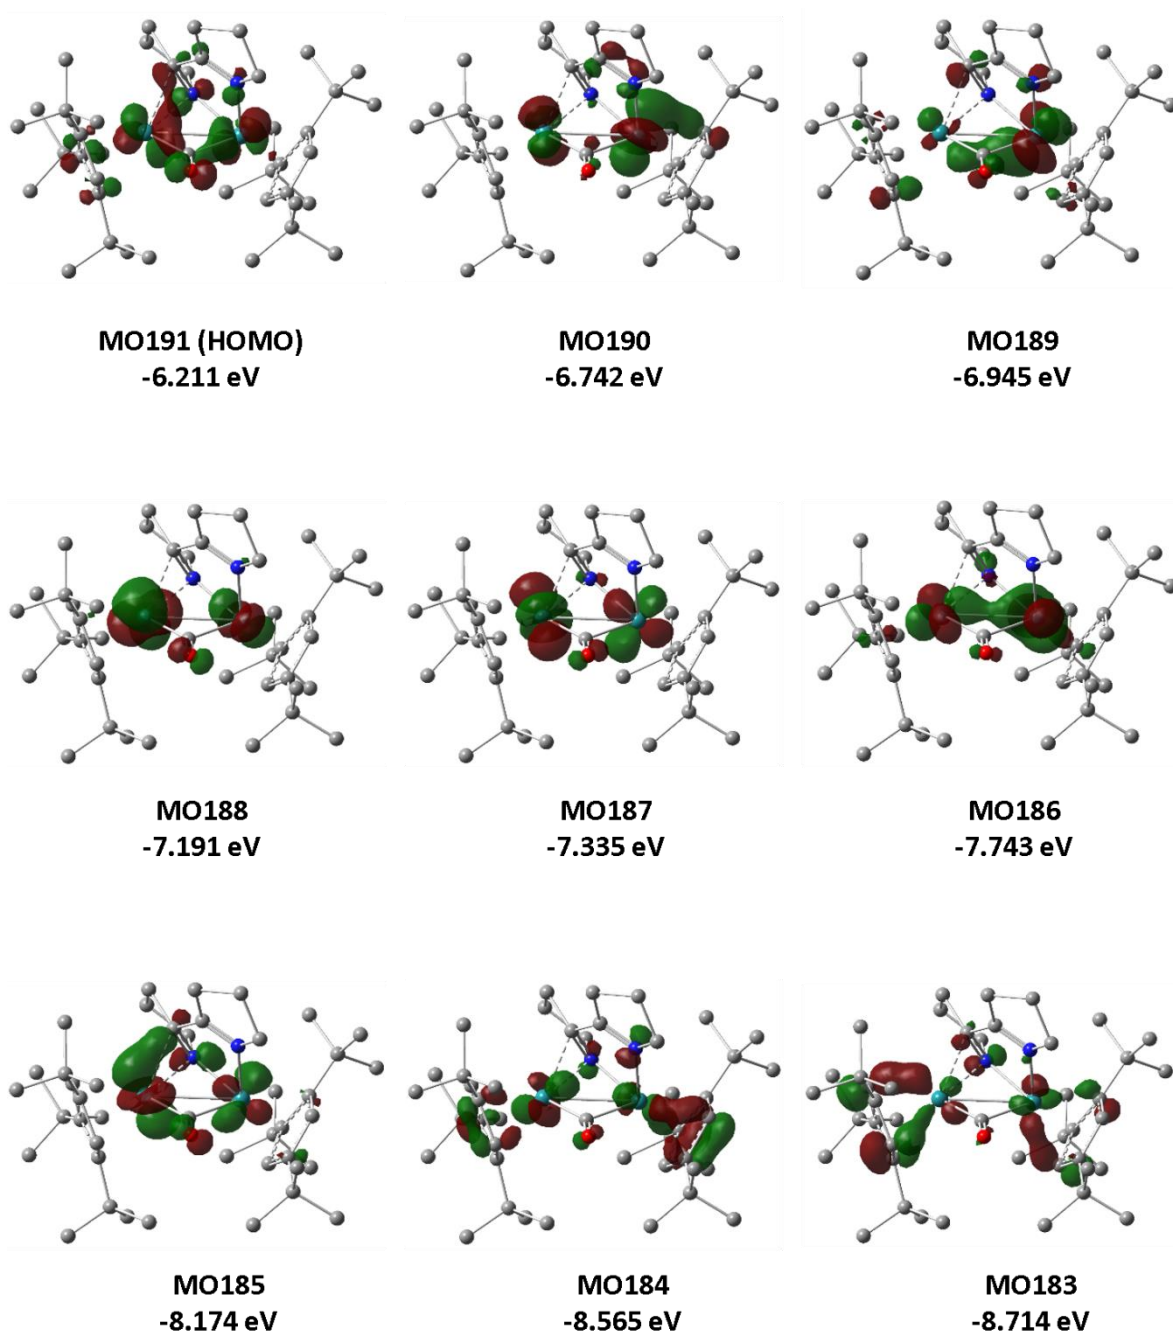

**Figure S41.** Shapes of selected molecular orbitals of **11** with their Eigenvalues (eV) ( $\omega$ B97X-D / SDD (Ru), -311++G(2d,p) (N(1), N(2), C(1), C(5), C(9), and O(1)), 6-31G(d,p) (other C, H), isovalue 0.06).

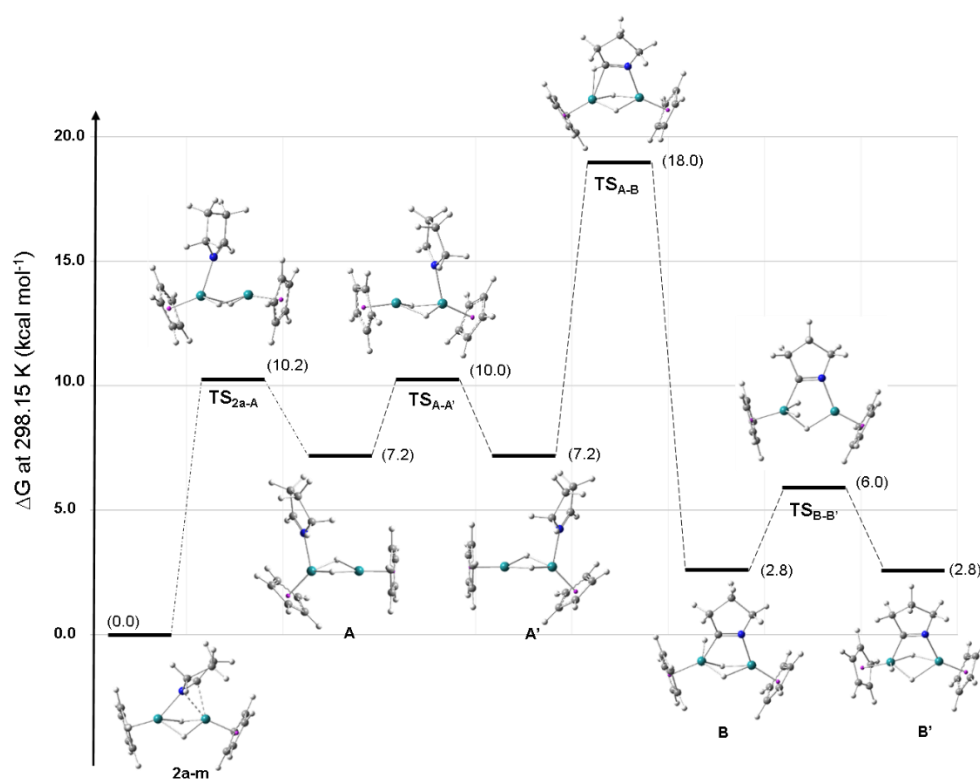

**Figure S42.** Computed free energy profile (kcal mol<sup>-1</sup>, 298.15 K) for the isomerization of [(CpRu)<sub>2</sub>(μ-η<sup>2</sup>-C<sub>4</sub>H<sub>7</sub>N)(μ-H)<sub>2</sub>] (**2a-m**) to [(CpRu)<sub>2</sub>(μ-C<sub>4</sub>H<sub>6</sub>N)(μ-H)<sub>2</sub>(H)] (**B**) (B3LYP / SDD (Ru), 6-31G(d,p) (C, H, N)).

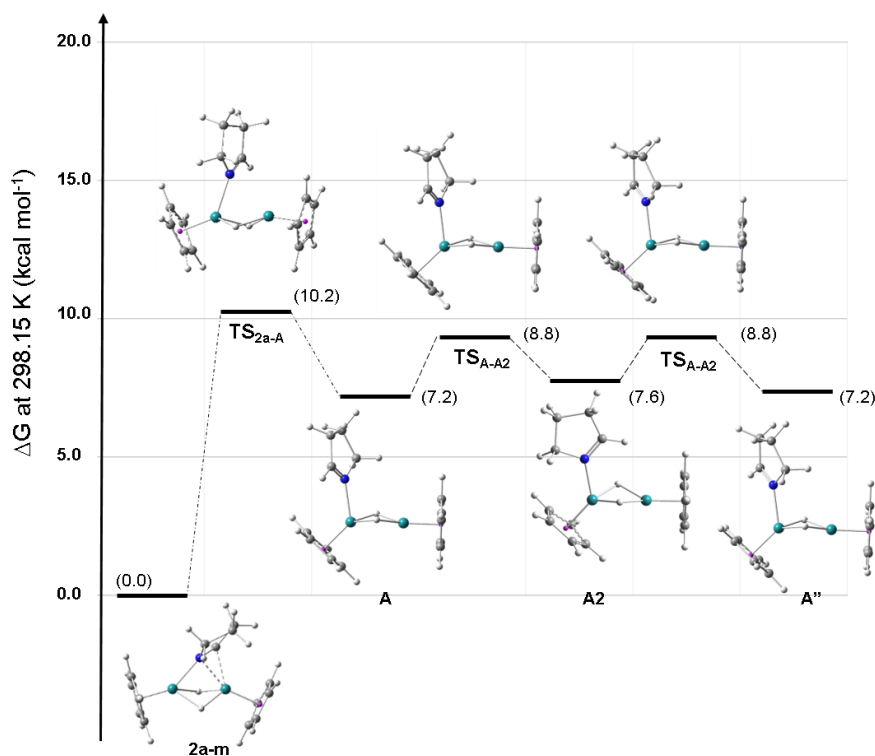

**Figure S43.** Computed free energy profile (kcal mol<sup>-1</sup>, 298.15 K) for the rotation of κ(N)-coordinated 1-pyrroline ligand in [(CpRu)<sub>2</sub>(κ(N)-C<sub>4</sub>H<sub>7</sub>N)(μ-H)<sub>2</sub>] (**A**) (B3LYP / SDD (Ru), 6-31G(d,p) (C, H, N)).

**Table S17.** Selected bond lengths [ $\text{\AA}$ ] and results of frequency calculations for the optimized structures **2a-m**, **TS<sub>2a-A</sub>**, **A**, **TS<sub>A-A'</sub>**, **A2**, **TS<sub>A-A2</sub>**, **TS<sub>A-B</sub>**, **B**, and **TS<sub>B-B'</sub>**.

|                                                                      |                                                                                   |                                                                                    |                                                                                     |
|----------------------------------------------------------------------|-----------------------------------------------------------------------------------|------------------------------------------------------------------------------------|-------------------------------------------------------------------------------------|
|                                                                      | 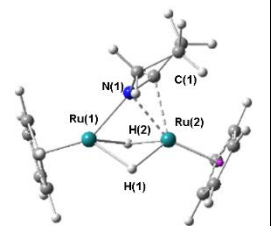 |  |  |
| Ru(1)–Ru(2)                                                          | 2.6453                                                                            | 2.5711                                                                             | 2.5370                                                                              |
| Ru(1)–N(1)                                                           | 2.0991                                                                            | 2.1290                                                                             | 2.1015                                                                              |
| Ru(1)–H(1)                                                           | 1.8900                                                                            | 1.7842                                                                             | 1.7706                                                                              |
| Ru(1)–H(2)                                                           | 1.7993                                                                            | 1.7788                                                                             | 1.7743                                                                              |
| Ru(2)–N(1)                                                           | 2.1529                                                                            | 2.7308                                                                             | 3.5381                                                                              |
| Ru(2)–C(1)                                                           | 2.1676                                                                            |                                                                                    |                                                                                     |
| Ru(2)–H(1)                                                           | 1.7217                                                                            | 1.7729                                                                             | 1.8125                                                                              |
| Ru(2)–H(2)                                                           | 1.7411                                                                            | 1.7882                                                                             | 1.8113                                                                              |
| C(1)–N(1)                                                            | 1.3834                                                                            | 1.2916                                                                             | 1.2847                                                                              |
| Sum of electronic and zero-point Energies (Hartree)                  | –789.273746                                                                       | –789.25543                                                                         | –789.257433                                                                         |
| Sum of electronic and thermal Energies (Hartree)                     | –789.257355                                                                       | –789.238618                                                                        | –789.239801                                                                         |
| Sum of electronic and thermal Enthalpies (Hartree)                   | –789.256411                                                                       | –789.237674                                                                        | –789.238856                                                                         |
| Sum of electronic and thermal Free Energies (Hartree)                | –789.319481                                                                       | –789.303256                                                                        | –789.307975                                                                         |
| Relative energy to <b>2a-m</b> at 298.15 K (kcal mol <sup>–1</sup> ) | 0.00                                                                              | +10.18                                                                             | +7.22                                                                               |

|                                                                      |                                                                                     |                                                                                      |                                                                                       |
|----------------------------------------------------------------------|-------------------------------------------------------------------------------------|--------------------------------------------------------------------------------------|---------------------------------------------------------------------------------------|
|                                                                      | 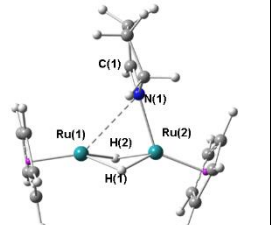 |  |  |
| Ru(1)–Ru(2)                                                          | 2.5674                                                                              | 2.52863                                                                              | 2.5342                                                                                |
| Ru(1)–N(1)                                                           | 2.8397                                                                              | 2.10065                                                                              | 2.1050                                                                                |
| Ru(1)–H(1)                                                           | 1.7900                                                                              | 1.77403                                                                              | 1.7671                                                                                |
| Ru(1)–H(2)                                                           | 1.7773                                                                              | 1.77339                                                                              | 1.7703                                                                                |
| Ru(2)–N(1)                                                           | 2.1188                                                                              | 3.58768                                                                              | 3.4993                                                                                |
| Ru(2)–C(1)                                                           |                                                                                     |                                                                                      |                                                                                       |
| Ru(2)–H(1)                                                           | 1.7753                                                                              | 1.80785                                                                              | 1.8153                                                                                |
| Ru(2)–H(2)                                                           | 1.7827                                                                              | 1.80793                                                                              | 1.8121                                                                                |
| C(1)–N(1)                                                            | 1.2901                                                                              | 1.28760                                                                              | 1.2841                                                                                |
| Sum of electronic and zero-point Energies (Hartree)                  | –789.255665                                                                         | –789.257645                                                                          | –789.257095                                                                           |
| Sum of electronic and thermal Energies (Hartree)                     | –789.238866                                                                         | –789.240169                                                                          | –789.240343                                                                           |
| Sum of electronic and thermal Enthalpies (Hartree)                   | –789.237922                                                                         | –789.240169                                                                          | –789.239398                                                                           |
| Sum of electronic and thermal Free Energies (Hartree)                | –789.303537                                                                         | –789.307299                                                                          | –789.305537                                                                           |
| Relative energy to <b>2a-m</b> at 298.15 K (kcal mol <sup>–1</sup> ) | +10.01                                                                              | +7.64                                                                                | +8.75                                                                                 |

**Table S17** (continued). Selected bond lengths [ $\text{\AA}$ ] and results of frequency calculations for the optimized structures **2a-m**, **TS<sub>2a-A</sub>**, **A**, **TS<sub>A-A'</sub>**, **A2**, **TS<sub>A-A2</sub>**, **TS<sub>A-B</sub>**, **B**, and **TS<sub>B-B'</sub>**.

|                                                                      | 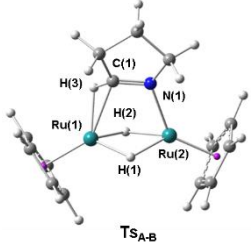 |  |  |
|----------------------------------------------------------------------|-----------------------------------------------------------------------------------|------------------------------------------------------------------------------------|-------------------------------------------------------------------------------------|
| Ru(1)–Ru(2)                                                          | 2.7084                                                                            | 2.8273                                                                             | 2.8646                                                                              |
| Ru(1)–N(1)                                                           | 2.3105                                                                            | 2.0168                                                                             | 2.0091                                                                              |
| Ru(1)–H(1)                                                           | 1.7258                                                                            | 1.6793                                                                             | 1.6006                                                                              |
| Ru(1)–H(2)                                                           | 1.7316                                                                            | 1.6645                                                                             | 1.6602                                                                              |
| Ru(2)–N(1)                                                           | 1.7650                                                                            | 1.5883                                                                             | 1.6019                                                                              |
| Ru(2)–C(1)                                                           | 2.1322                                                                            | 2.0869                                                                             | 2.0772                                                                              |
| Ru(2)–H(1)                                                           | 1.8174                                                                            | 1.8882                                                                             | 2.5402                                                                              |
| Ru(2)–H(2)                                                           | 1.8567                                                                            | 1.9526                                                                             | 1.8761                                                                              |
| C(1)–N(1)                                                            | 1.2960                                                                            | 1.3032                                                                             | 1.3064                                                                              |
| C(1)–H(3)                                                            | 1.1809                                                                            | 2.1865                                                                             |                                                                                     |
| Sum of electronic and zero-point Energies (Hartree)                  | –789.244139                                                                       | –789.267646                                                                        | –789.263334                                                                         |
| Sum of electronic and thermal Energies (Hartree)                     | –789.227673                                                                       | –789.250484                                                                        | –789.246700                                                                         |
| Sum of electronic and thermal Enthalpies (Hartree)                   | –789.226729                                                                       | –789.24954                                                                         | –789.245756                                                                         |
| Sum of electronic and thermal Free Energies (Hartree)                | –789.290799                                                                       | –789.315006                                                                        | –789.309981                                                                         |
| Relative energy to <b>2a-m</b> at 298.15 K (kcal mol <sup>–1</sup> ) | +18.00                                                                            | +2.81                                                                              | +5.96                                                                               |

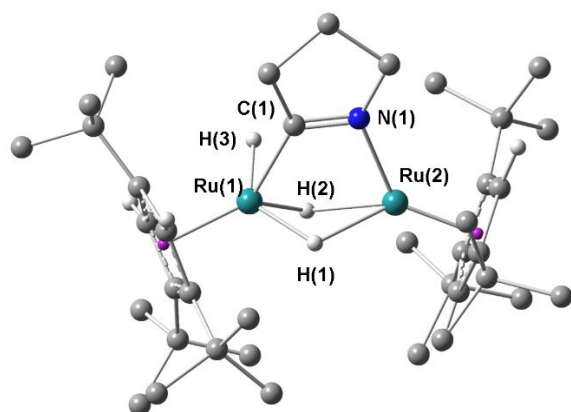

**Figure S44.** Optimized structure of  $[(\text{Cp}^*\text{Ru})_2(\mu\text{-C}_4\text{H}_6\text{N})(\mu\text{-H})_2(\text{H})]$  (**B<sup>‡</sup>**) ( $\omega\text{B97X-D}$  / SDD (Ru), 6-31G(d,p) (C, H, N)). Hydrogen atoms in the imidoyl and Cp<sup>\*</sup> groups were omitted for clarity.

**Table S18.** Selected bond lengths [ $\text{\AA}$ ] in **B<sup>‡</sup>** and **B'**, which were optimized at a  $\omega\text{B97X-D}$  level. Corresponding data of **B** was also shown for comparison

|             | <b>B<sup>‡</sup></b><br>( $\omega\text{B97X-D}$ ) | <b>B</b><br>(B3LYP) | <b>B'</b><br>( $\omega\text{B97X-D}$ ) |
|-------------|---------------------------------------------------|---------------------|----------------------------------------|
| Ru(1)–Ru(2) | 2.8915                                            | 2.8273              | 2.8122                                 |
| Ru(1)–C(1)  | 2.0155                                            | 2.0168              | 2.0073                                 |
| Ru(1)–H(1)  | 1.6630                                            | 1.6793              | 1.6619                                 |
| Ru(1)–H(2)  | 1.65459                                           | 1.6645              | 1.6512                                 |
| Ru(1)–H(3)  | 1.5871                                            | 1.5883              | 1.5840                                 |
| Ru(2)–N(1)  | 2.0660                                            | 2.0869              | 2.0813                                 |
| Ru(2)–H(1)  | 1.9485                                            | 1.8882              | 1.9175                                 |
| Ru(2)–H(2)  | 2.0416                                            | 1.9526              | 1.9775                                 |
| C(1)–N(1)   | 1.2973                                            | 1.3032              | 1.2970                                 |
| C(1)–H(3)   | 2.1997                                            | 2.1865              | 2.1595                                 |

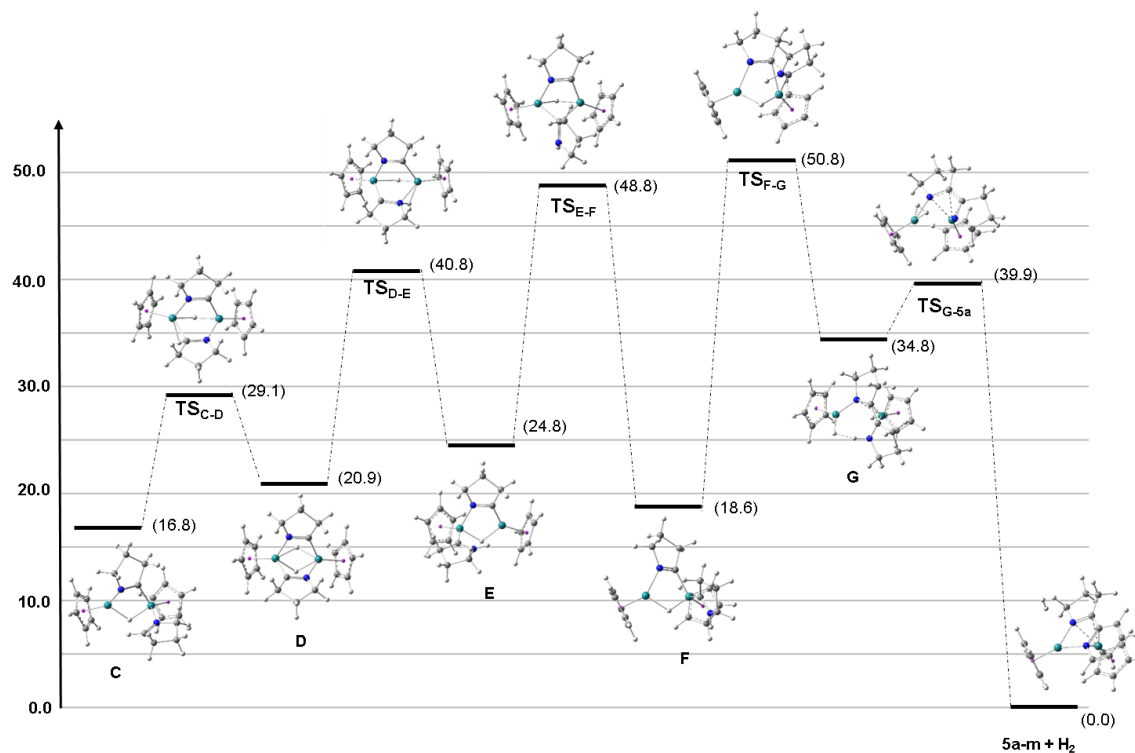

**Figure S45.** Computed free energy profile (kcal mol<sup>-1</sup>, 298.15 K) for the reaction of **3a-m** with 1-pyrroline yielding **5a-m** (B3LYP / SDD (Ru), 6-31G(d,p) (C, H, N))

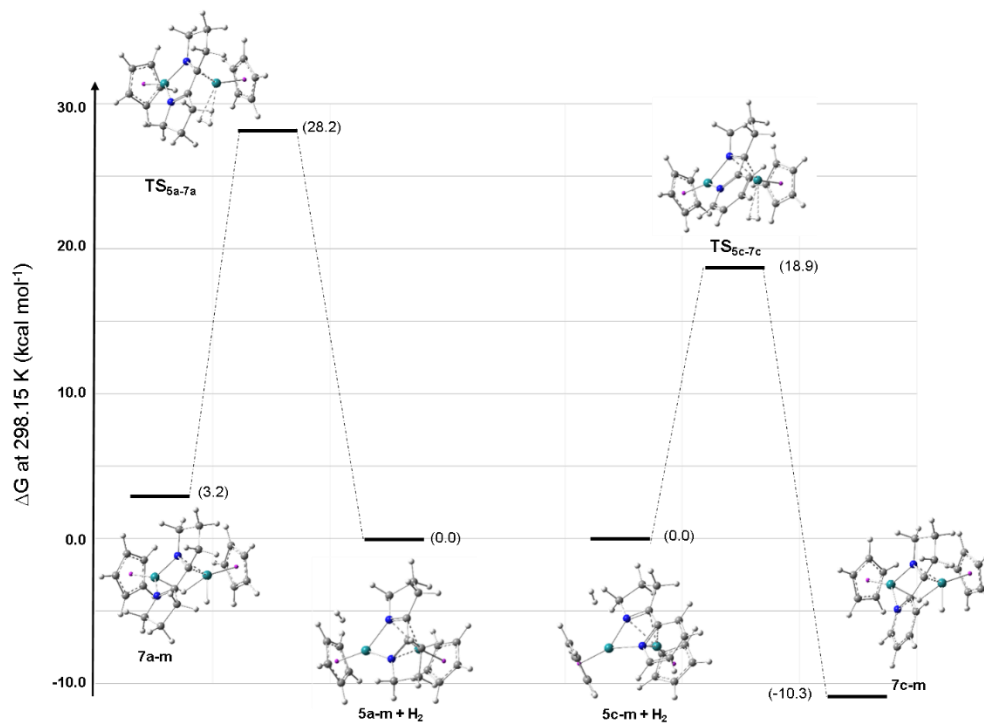

**Figure S46.** Computed free energy profile (kcal mol<sup>-1</sup>, 298.15 K) for the reaction of **5a-m** and **5c-m** with dihydrogen yielding **7a-m** and **7c-m** (B3LYP / SDD (Ru), 6-31G(d,p) (C, H, N))

**Table S19.** Selected bond lengths [ $\text{\AA}$ ] and results of frequency calculations for the optimized structures **3a-m**, **1-pyrroline**, **C**, **TS<sub>C-D</sub>**, **D**, **TS<sub>D-E</sub>**, **E**, **TS<sub>E-F</sub>**, **F**, **TS<sub>F-G</sub>**, **G**, **TS<sub>G-5a</sub>**, **5a-m**, **TS<sub>5a-7a</sub>**, **7a-m**, and **C'**.

|                                                                                           |                                                                                     |                                                                                      |                                                                                       |
|-------------------------------------------------------------------------------------------|-------------------------------------------------------------------------------------|--------------------------------------------------------------------------------------|---------------------------------------------------------------------------------------|
|                                                                                           | 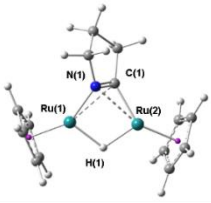   |    |    |
|                                                                                           | <b>3a-m</b>                                                                         |                                                                                      | <b>C</b>                                                                              |
| Ru(1)–Ru(2)                                                                               | 2.8106                                                                              |                                                                                      | 2.8927                                                                                |
| Ru(1)–N(1)                                                                                | 2.0097                                                                              |                                                                                      | 2.0329                                                                                |
| Ru(1)–C(1)                                                                                | 2.4696                                                                              |                                                                                      | 2.5692                                                                                |
| Ru(1)–H(1)                                                                                | 1.7696                                                                              |                                                                                      | 1.7861                                                                                |
| Ru(2)–N(1)                                                                                | 2.5622                                                                              |                                                                                      | 2.8946                                                                                |
| Ru(2)–N(2)                                                                                |                                                                                     |                                                                                      | 2.1009                                                                                |
| Ru(2)–C(1)                                                                                | 1.9592                                                                              |                                                                                      | 1.9942                                                                                |
| Ru(2)–H(1)                                                                                | 1.7255                                                                              |                                                                                      | 1.7088                                                                                |
| C(1)–N(1)                                                                                 | 1.3398                                                                              |                                                                                      | 1.3282                                                                                |
| C(2)–N(2)                                                                                 |                                                                                     | 1.2741                                                                               | 1.2877                                                                                |
| C(2)–H(2)                                                                                 |                                                                                     | 1.0912                                                                               | 1.0849                                                                                |
| Sum of electronic and zero-point Energies (Hartree)                                       | –788.071278                                                                         | –211.276478                                                                          | –999.380756                                                                           |
| Sum of electronic and thermal Energies (Hartree)                                          | –788.054629                                                                         | –211.271924                                                                          | –999.358517                                                                           |
| Sum of electronic and thermal Enthalpies (Hartree)                                        | –788.053685                                                                         | –211.27098                                                                           | –999.357573                                                                           |
| Sum of electronic and thermal Free Energies (Hartree)                                     | –788.119414                                                                         | –211.303961                                                                          | –999.435568                                                                           |
| Relative energy to [ <b>5a-m</b> + H <sub>2</sub> ] at 298.15 K (kcal mol <sup>–1</sup> ) | [ <b>3a-m</b> + 1-pyrroline] +24.48                                                 |                                                                                      | +16.83                                                                                |
|                                                                                           |  |  |  |
|                                                                                           | <b>E</b>                                                                            | <b>TS<sub>E-F</sub></b>                                                              | <b>F</b>                                                                              |
| Ru(1)–Ru(2)                                                                               | 2.8906                                                                              | 2.8001                                                                               | 2.9073                                                                                |
| Ru(1)–N(1)                                                                                | 2.0947                                                                              | 1.9701                                                                               | 2.0294                                                                                |
| Ru(1)–C(2)                                                                                | 1.9635                                                                              | 2.0183                                                                               |                                                                                       |
| Ru(1)–H(1)                                                                                | 1.7212                                                                              | 1.7362                                                                               | 1.7960                                                                                |
| Ru(2)–C(1)                                                                                | 2.0158                                                                              | 1.9528                                                                               | 1.9793                                                                                |
| Ru(2)–C(2)                                                                                |                                                                                     | 2.2019                                                                               | 1.9671                                                                                |
| Ru(2)–H(1)                                                                                | 1.7674                                                                              | 1.7699                                                                               | 1.7015                                                                                |
| C(1)–N(1)                                                                                 | 1.3010                                                                              | 1.3469                                                                               | 1.3331                                                                                |
| C(2)–N(2)                                                                                 | 1.3380                                                                              | 1.4147                                                                               | 1.3449                                                                                |
| N(2)–H(2)                                                                                 | 1.0158                                                                              | 1.0096                                                                               | 1.0109                                                                                |
| Sum of electronic and zero-point Energies (Hartree)                                       | –999.36858                                                                          | –999.332972                                                                          | –999.377463                                                                           |
| Sum of electronic and thermal Energies (Hartree)                                          | –999.346191                                                                         | –999.332972                                                                          | –999.355145                                                                           |
| Sum of electronic and thermal Enthalpies (Hartree)                                        | –999.345247                                                                         | –999.332972                                                                          | –999.354201                                                                           |
| Sum of electronic and thermal Free Energies (Hartree)                                     | –999.422881                                                                         | –999.384548                                                                          | –999.432696                                                                           |
| Relative energy to [ <b>5a-m</b> + H <sub>2</sub> ] at 298.15 K (kcal mol <sup>–1</sup> ) | +24.79                                                                              | +48.84                                                                               | +18.63                                                                                |

**Table S19** (continued). Selected bond lengths [ $\text{\AA}$ ] and results of frequency calculations for the optimized structures **3a-m**, **1-pyrroline**, **C**, **TS<sub>C-D</sub>**, **D**, **TS<sub>D-E</sub>**, **E**, **TS<sub>E-F</sub>**, **F**, **TS<sub>F-G</sub>**, **G**, **TS<sub>G-5a</sub>**, **5a-m**, **TS<sub>5a-7a</sub>**, **7a-m**, and **C'**.

|                                                                                           |                                                                                     |                                                                                      |                                                                                       |
|-------------------------------------------------------------------------------------------|-------------------------------------------------------------------------------------|--------------------------------------------------------------------------------------|---------------------------------------------------------------------------------------|
|                                                                                           | 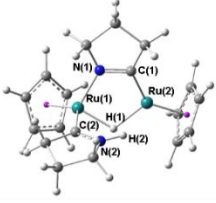   |    |    |
|                                                                                           | <b>E</b>                                                                            | <b>TS<sub>E-F</sub></b>                                                              | <b>F</b>                                                                              |
| Ru(1)–Ru(2)                                                                               | 2.8906                                                                              | 2.8001                                                                               | 2.9073                                                                                |
| Ru(1)–N(1)                                                                                | 2.0947                                                                              | 1.9701                                                                               | 2.0294                                                                                |
| Ru(1)–C(2)                                                                                | 1.9635                                                                              | 2.0183                                                                               |                                                                                       |
| Ru(1)–H(1)                                                                                | 1.7212                                                                              | 1.7362                                                                               | 1.7960                                                                                |
| Ru(2)–C(1)                                                                                | 2.0158                                                                              | 1.9528                                                                               | 1.9793                                                                                |
| Ru(2)–C(2)                                                                                |                                                                                     | 2.2019                                                                               | 1.9671                                                                                |
| Ru(2)–H(1)                                                                                | 1.7674                                                                              | 1.7699                                                                               | 1.7015                                                                                |
| C(1)–N(1)                                                                                 | 1.3010                                                                              | 1.3469                                                                               | 1.3331                                                                                |
| C(2)–N(2)                                                                                 | 1.3380                                                                              | 1.4147                                                                               | 1.3449                                                                                |
| N(2)–H(2)                                                                                 | 1.0158                                                                              | 1.0096                                                                               | 1.0109                                                                                |
| Sum of electronic and zero-point Energies (Hartree)                                       | –999.36858                                                                          | –999.332972                                                                          | –999.377463                                                                           |
| Sum of electronic and thermal Energies (Hartree)                                          | –999.346191                                                                         | –999.332972                                                                          | –999.355145                                                                           |
| Sum of electronic and thermal Enthalpies (Hartree)                                        | –999.345247                                                                         | –999.332972                                                                          | –999.354201                                                                           |
| Sum of electronic and thermal Free Energies (Hartree)                                     | –999.422881                                                                         | –999.384548                                                                          | –999.432696                                                                           |
| Relative energy to [ <b>5a-m</b> + H <sub>2</sub> ] at 298.15 K (kcal mol <sup>–1</sup> ) | +24.79                                                                              | +48.84                                                                               | +18.63                                                                                |
|                                                                                           |  |  |  |
|                                                                                           | <b>TS<sub>F-G</sub></b>                                                             | <b>G</b>                                                                             | <b>TS<sub>G-5a</sub></b>                                                              |
| Ru(1)–Ru(2)                                                                               | 2.6916                                                                              | 3.1382                                                                               | 2.9047                                                                                |
| Ru(1)–N(1)                                                                                | 2.0541                                                                              | 2.1000                                                                               | 2.0522                                                                                |
| Ru(1)–N(2)                                                                                |                                                                                     |                                                                                      | 2.7879                                                                                |
| Ru(1)–H(1)                                                                                | 1.7776                                                                              | 1.6584                                                                               | 2.0084                                                                                |
| Ru(1)–H(2)                                                                                |                                                                                     |                                                                                      | 2.0562                                                                                |
| Ru(2)–N(1)                                                                                | 2.7381                                                                              | 2.2520                                                                               | 2.1952                                                                                |
| Ru(2)–N(2)                                                                                | 3.0315                                                                              | 2.1887                                                                               | 2.2081                                                                                |
| Ru(2)–C(1)                                                                                | 2.1713                                                                              | 2.2091                                                                               | 2.1694                                                                                |
| Ru(2)–C(2)                                                                                | 1.9909                                                                              | 2.1659                                                                               | 2.1862                                                                                |
| Ru(2)–H(1)                                                                                | 1.7590                                                                              |                                                                                      |                                                                                       |
| C(1)–N(1)                                                                                 | 1.3166                                                                              | 1.3916                                                                               | 1.4083                                                                                |
| C(1)–C(2)                                                                                 | 1.8071                                                                              | 1.4070                                                                               | 1.4182                                                                                |
| C(2)–N(2)                                                                                 | 1.3886                                                                              | 1.4130                                                                               | 1.3693                                                                                |
| N(2)–H(2)                                                                                 | 1.01039                                                                             | 1.0515                                                                               | 2.2438                                                                                |
| H(1)–H(2)                                                                                 |                                                                                     | 1.4354                                                                               | 0.7764                                                                                |
| Sum of electronic and zero-point Energies (Hartree)                                       | –999.329206                                                                         | –999.356303                                                                          | –999.349246                                                                           |
| Sum of electronic and thermal Energies (Hartree)                                          | –999.307623                                                                         | –999.335343                                                                          | –999.327894                                                                           |
| Sum of electronic and thermal Enthalpies (Hartree)                                        | –999.306679                                                                         | –999.334399                                                                          | –999.326950                                                                           |
| Sum of electronic and thermal Free Energies (Hartree)                                     | –999.38144                                                                          | –999.406858                                                                          | –999.398850                                                                           |
| Relative energy to [ <b>5a-m</b> + H <sub>2</sub> ] at 298.15 K (kcal mol <sup>–1</sup> ) | +50.79                                                                              | +34.84                                                                               | +39.87                                                                                |



**Table S19** (continued). Selected bond lengths [Å] and results of frequency calculations for the optimized structures **3a-m**, **1-pyrroline**, **C**, **TS<sub>C-D</sub>**, **D**, **TS<sub>D-E</sub>**, **E**, **TS<sub>E-F</sub>**, **F**, **TS<sub>F-G</sub>**, **G**, **TS<sub>G-5a</sub>**, **5a-m**, **TS<sub>5a-7a</sub>**, **7a-m**, and **C'**.

|                                                                                           |                                                                                     |                                                                                      |                                                                                     |
|-------------------------------------------------------------------------------------------|-------------------------------------------------------------------------------------|--------------------------------------------------------------------------------------|-------------------------------------------------------------------------------------|
|                                                                                           | 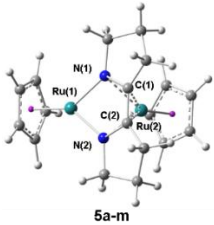   |                                                                                      |  |
|                                                                                           |                                                                                     | H <sub>2</sub>                                                                       |                                                                                     |
| Ru(1)–Ru(2)                                                                               | 2.8281                                                                              |                                                                                      | 2.9382                                                                              |
| Ru(1)–N(1)                                                                                | 2.0648                                                                              |                                                                                      | 2.0436                                                                              |
| Ru(1)–N(2)                                                                                | 2.0649                                                                              |                                                                                      | 2.0345                                                                              |
| Ru(2)–N(1)                                                                                | 2.2324                                                                              |                                                                                      | 2.1526                                                                              |
| Ru(2)–N(2)                                                                                | 2.2330                                                                              |                                                                                      |                                                                                     |
| Ru(2)–C(1)                                                                                | 2.1794                                                                              |                                                                                      | 2.1898                                                                              |
| Ru(2)–C(2)                                                                                | 2.1797                                                                              |                                                                                      |                                                                                     |
| Ru(2)–H(1)                                                                                |                                                                                     |                                                                                      | 2.3135                                                                              |
| Ru(2)–H(2)                                                                                |                                                                                     |                                                                                      | 2.3145                                                                              |
| C(1)–N(1)                                                                                 | 1.3971                                                                              |                                                                                      | 1.4132                                                                              |
| C(1)–C(2)                                                                                 | 1.4092                                                                              |                                                                                      |                                                                                     |
| C(2)–N(2)                                                                                 | 1.3971                                                                              |                                                                                      | 1.3395                                                                              |
| H(1)–H(2)                                                                                 |                                                                                     | 0.7428                                                                               | 0.7667                                                                              |
| Sum of electronic and zero-point Energies (Hartree)                                       | –998.232732                                                                         | –1.168366                                                                            | –999.366682                                                                         |
| Sum of electronic and thermal Energies (Hartree)                                          | –998.212651                                                                         | –1.166005                                                                            | –999.345217                                                                         |
| Sum of electronic and thermal Enthalpies (Hartree)                                        | –998.212651                                                                         | –1.166005                                                                            | –999.344272                                                                         |
| Sum of electronic and thermal Free Energies (Hartree)                                     | –998.282529                                                                         | –1.179853                                                                            | –999.417431                                                                         |
| Relative energy to [ <b>5a-m</b> + H <sub>2</sub> ] at 298.15 K (kcal mol <sup>–1</sup> ) |                                                                                     | [ <b>5a-m</b> + H <sub>2</sub> ] 0.00                                                | +28.21                                                                              |
|                                                                                           |  |  |                                                                                     |
| Ru(1)–Ru(2)                                                                               | 2.89701                                                                             | 2.88617                                                                              |                                                                                     |
| Ru(1)–N(1)                                                                                | 2.05594                                                                             | 2.09556                                                                              |                                                                                     |
| Ru(1)–N(2)                                                                                |                                                                                     | 2.10467                                                                              |                                                                                     |
| Ru(1)–H(1)                                                                                | 1.80466                                                                             | 1.74277                                                                              |                                                                                     |
| Ru(2)–N(1)                                                                                | 2.08885                                                                             |                                                                                      |                                                                                     |
| Ru(2)–C(1)                                                                                | 2.18602                                                                             | 2.01191                                                                              |                                                                                     |
| Ru(2)–H(1)                                                                                | 1.73112                                                                             | 1.76261                                                                              |                                                                                     |
| Ru(2)–H(2)                                                                                | 1.58119                                                                             |                                                                                      |                                                                                     |
| C(1)–N(1)                                                                                 | 1.41500                                                                             | 1.30285                                                                              |                                                                                     |
| C(1)–C(2)                                                                                 | 1.45587                                                                             |                                                                                      |                                                                                     |
| C(2)–N(2)                                                                                 | 1.30013                                                                             | 1.28763                                                                              |                                                                                     |
| Sum of electronic and zero-point Energies (Hartree)                                       | –999.407107                                                                         | –999.36929                                                                           |                                                                                     |
| Sum of electronic and thermal Energies (Hartree)                                          | –999.386333                                                                         | –999.346808                                                                          |                                                                                     |
| Sum of electronic and thermal Enthalpies (Hartree)                                        | –999.385389                                                                         | –999.345864                                                                          |                                                                                     |
| Sum of electronic and thermal Free Energies (Hartree)                                     | –999.457319                                                                         | –999.423822                                                                          |                                                                                     |
| Relative energy to [ <b>5a-m</b> + H <sub>2</sub> ] at 298.15 K (kcal mol <sup>–1</sup> ) | +3.18                                                                               | +24.20                                                                               |                                                                                     |

**Table S20.** Selected bond lengths [ $\text{\AA}$ ] and results of frequency calculations for the optimized structures **5c-m**, **TS<sub>5c-7c</sub>**, and **7c-m**.

|                                                                       | 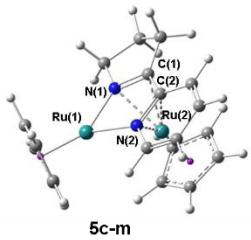 |  |  |
|-----------------------------------------------------------------------|-----------------------------------------------------------------------------------|------------------------------------------------------------------------------------|-------------------------------------------------------------------------------------|
| Ru(1)–Ru(2)                                                           | 2.8275                                                                            | 2.8823                                                                             | 2.8595                                                                              |
| Ru(1)–N(1)                                                            | 2.0413                                                                            | 2.0131                                                                             | 2.0445                                                                              |
| Ru(1)–N(2)                                                            | 2.1084                                                                            | 2.0837                                                                             | 2.0964                                                                              |
| Ru(1)–H(1)                                                            |                                                                                   |                                                                                    | 1.8113                                                                              |
| Ru(2)–N(1)                                                            | 2.2346                                                                            | 2.1716                                                                             | 2.0638                                                                              |
| Ru(2)–N(2)                                                            | 2.3097                                                                            |                                                                                    |                                                                                     |
| Ru(2)–C(1)                                                            | 2.1710                                                                            | 2.1674                                                                             | 2.1456                                                                              |
| Ru(2)–C(2)                                                            | 2.2599                                                                            |                                                                                    |                                                                                     |
| Ru(2)–H(1)                                                            |                                                                                   | 2.3847                                                                             | 1.7208                                                                              |
| Ru(2)–H(2)                                                            |                                                                                   | 2.6025                                                                             | 1.5826                                                                              |
| C(1)–N(1)                                                             | 1.3940                                                                            | 1.4095                                                                             | 1.4074                                                                              |
| C(1)–C(2)                                                             | 1.4209                                                                            | 1.4388                                                                             | 1.4555                                                                              |
| C(2)–N(2)                                                             | 1.3001                                                                            | 1.3841                                                                             | 1.3951                                                                              |
| Sum of electronic and zero-point Energies (Hartree)                   | –1035.133143                                                                      | –1036.282576                                                                       | –1036.330359                                                                        |
| Sum of electronic and thermal Energies (Hartree)                      | –1035.112717                                                                      | –1036.260698                                                                       | –1036.309823                                                                        |
| Sum of electronic and thermal Enthalpies (Hartree)                    | –1035.111773                                                                      | –1036.259754                                                                       | –1036.308879                                                                        |
| Sum of electronic and thermal Free Energies (Hartree)                 | –1035.183767                                                                      | –1036.33358                                                                        | –1036.379975                                                                        |
| Relative energy to <b>7c-m</b> at 298.15 K ( $\text{kcal mol}^{-1}$ ) | [ <b>5c-m</b> + H <sub>2</sub> ] +10.26                                           | +29.11                                                                             | 0.00                                                                                |
